# Supplementary material for: Sulfur-hinged L-shaped ligand-based Cd(ii)–organic framework: a fluorescent tool for targeting environmental nitroaromatics
Source: Royal Society of Chemistry journal article supplement (doi:10.1039/d4ce01050g), 2024-01-01
Supplement: d4ce01050g1.pdf [file d4ce01050g1.pdf]

**Supporting Information  
For the  
Manuscript**

**Sulfur-hinged L-shaped ligand-based Cd(II)-organic framework: A fluorescent tool for targeting environmental nitroaromatics†**

Nitu Rani,<sup>a</sup> Aman K. K. Bhasin,<sup>b</sup> Ahamd Husain,<sup>c</sup> Annu Kumari,<sup>d</sup> Reshu Verma,<sup>d</sup> K. K. Bhasin\*<sup>a</sup> and Girijesh Kumar\*<sup>d</sup>

*<sup>a</sup>Department of Chemistry & Centre for Advanced Studies in Chemistry, Panjab University, Chandigarh-160014, India*

*<sup>b</sup>Department of Chemistry, DAV University Jalandhar, Punjab-144012, India*

*<sup>c</sup>Department of Chemistry, Amity University, Sector 82A, Mohali, Punjab-140306, India*

*<sup>d</sup>Department of Chemistry, University of Allahabad, Prayagraj, Uttar Pradesh-211002, India.*

*Email: girijeshkumar@allduniv.ac.in, girijeshchem@gmail.com*

| Table of content: |                                                                                                                                                                                                         | P. No. |
|-------------------|---------------------------------------------------------------------------------------------------------------------------------------------------------------------------------------------------------|--------|
|                   | Scheme S1. Synthesis of ligand <b>L<sup>4-py</sup></b>                                                                                                                                                  | S4     |
| Fig. S1           | <sup>1</sup> H NMR spectrum of ligand <b>L<sup>4-py</sup></b> in DMSO-d <sub>6</sub> .                                                                                                                  | S4     |
| Fig. S2           | <sup>13</sup> C NMR spectrum of ligand <b>L<sup>4-py</sup></b> in DMSO-d <sub>6</sub> .                                                                                                                 | S5     |
| Fig. S3           | FT-IR spectrum of ligand <b>L<sup>4-py</sup></b> .                                                                                                                                                      | S6     |
| Fig. S4           | FT-IR spectra of <b>Cd-MOF</b> .                                                                                                                                                                        | S6     |
| Fig. S5           | UV-Visible spectra of ligand <b>L<sup>4-py</sup></b> , co-ligand H <sub>2</sub> nipa, <b>Cd-MOF</b> in DMSO.                                                                                            | S7     |
| Fig. S6           | CHNS data of <b>Cd-MOF</b> .                                                                                                                                                                            | S8     |
| Fig. S7           | H-bonding interactions involving N–H---N and N–H---O of amide functionalities of <b>L<sup>4-py</sup></b> .                                                                                              | S9     |
| Fig. S8           | PXRD pattern for <b>Cd-MOF</b> , bulk sample (red trace) and the one simulated from the single crystal structural analysis (black trace) using Mercury 4.0.                                             | S9     |
| Fig. S9           | TGA plot for <b>Cd-MOF</b> .                                                                                                                                                                            | S10    |
| Fig. S10          | DSC plot for <b>Cd-MOF</b> .                                                                                                                                                                            | S10    |
| Fig. S11          | Emission spectra of ligand <b>L<sup>4-py</sup></b> , co-ligand H <sub>2</sub> nipa.                                                                                                                     | S11    |
| Fig. S12          | Emission spectra of <b>Cd-MOF</b> .                                                                                                                                                                     | S11    |
| Fig. S13          | (a) Emission Profile of <b>Cd-MOF</b> in different solvents. (b) Emission Profile of <b>Cd-MOF</b> in H <sub>2</sub> O and dry MeOH, wherein the highest emission intensity observed.                   | S12    |
| Fig. S14          | PXRD pattern of <b>Cd-MOF</b> and the samples recovered after soaking in H <sub>2</sub> O and MeOH for 24 h.                                                                                            | S12    |
| Fig. S15          | TGA plot of <b>Cd-MOF</b> and the samples recovered after soaking in MeOH and H <sub>2</sub> O for 24 h.                                                                                                | S13    |
| Fig. S16          | FT-IR spectrum of <b>Cd-MOF</b> and the samples recovered after soaking in H <sub>2</sub> O at different pH for 24 h.                                                                                   | S13    |
| Fig. S17          | PXRD pattern of <b>Cd-MOF</b> and the samples recovered after soaking in H <sub>2</sub> O at different pH for 24 h.                                                                                     | S14    |
| Fig. S18          | FT-IR spectrum of <b>Cd-MOF</b> and the samples recovered after soaking in H <sub>2</sub> O at different temperature for 24 h.                                                                          | S14    |
| Fig. S19          | PXRD pattern of <b>Cd-MOF</b> and the samples recovered after soaking in H <sub>2</sub> O at different temperature for 24 h.                                                                            | S15    |
| Chart S1          | Chemical structures of nitroaromatics used in present sensing study.                                                                                                                                    | S15    |
|                   | Calculation of Stern–Volmer constant ( <i>K<sub>SV</sub></i> ) and limit of detection (LOD).                                                                                                            | S16    |
| Fig. S20          | (a,b) S–V plot for the recognition of 4-NP and 4-NT, respectively. (c-d) Limit of detection calculation plots for the sensing of 4-NP and 4-NT analytes by <b>Cd-MOF</b> respectively.                  | S17    |
| Fig. S21          | The relative fluorescence intensity of <b>Cd-MOF</b> upon addition of solution of 2,4-DNP, 2-NP, 2-NA respectively.                                                                                     | S18    |
| Fig. S22          | (a-c) S–V plot for the recognition of 2,4-DNP, 2-NP and 2-NA respectively. (d-f) Limit of detection calculation plots for the sensing of 2,4-DNP, 2-NP and 2-NA analytes by <b>Cd-MOF</b> respectively. | S19    |
| Fig. S23          | The relative fluorescence intensity of <b>Cd-MOF</b> upon addition of solution of 4-NA, 3-NA, 3-NBA respectively.                                                                                       | S20    |

|          |                                                                                                                                                                                                                                                                                                                                                                                                  |             |
|----------|--------------------------------------------------------------------------------------------------------------------------------------------------------------------------------------------------------------------------------------------------------------------------------------------------------------------------------------------------------------------------------------------------|-------------|
| Fig. S24 | (a-c) S-V plot for the recognition of 4-NA, 3-NA and 3-NBA respectively. (d-f) Limit of detection calculation plots for the sensing of 4-NA, 3-NA and 3-NBA analytes by <b>Cd-MOF</b> respectively.                                                                                                                                                                                              | S21         |
| Fig. S25 | The relative fluorescence intensity of <b>Cd-MOF</b> upon addition of solution of 4-NB, 2,4,6-TNP and 1,3-DNB respectively.                                                                                                                                                                                                                                                                      | S22         |
| Fig. S26 | (a-c) S-V plot for the recognition of 4-NB, 2,4,6-TNP and 1,3-DNB respectively. (d-f) Limit of detection calculation plots for the sensing of 4-NB, 2,4,6-TNP and 1,3-DNB analytes by <b>Cd-MOF</b> respectively.                                                                                                                                                                                | S23         |
| Fig. S27 | Time dependent fluorescence response of <b>Cd-MOF</b> towards 4-NP, 4-NT and 2,4-DNP.                                                                                                                                                                                                                                                                                                            | S24         |
| Fig. S28 | Relative emission intensity of <b>Cd-MOF</b> upon addition of 50 $\mu$ L of 4-NP and 4-NT (from 10 mM stock solution) in the presence of 50 $\mu$ L of other nitroaromatics in CH <sub>3</sub> OH.                                                                                                                                                                                               | S24         |
|          | Calculation of binding constant using Benesi-Hildebrand and fluorescence method:                                                                                                                                                                                                                                                                                                                 | S25         |
| Fig. S29 | (a-d) BH plot from the fluorescence titration data of receptor <b>Cd-MOF</b> (suspension) with 4-NP or 4-NT or 2,4-DNP or 2-NP respectively.                                                                                                                                                                                                                                                     | S26         |
| Fig. S30 | (a-d) BH plot from the fluorescence titration data of receptor <b>Cd-MOF</b> (suspension) with 2-NA, 4-NA, 3-NA and 3-NBA respectively.                                                                                                                                                                                                                                                          | S27         |
| Fig. S31 | (a-c) BH plot from the fluorescence titration data of receptor <b>Cd-MOF</b> (suspension) with 4-NB, 2,4,6-TNP and 1,3-DNB respectively.                                                                                                                                                                                                                                                         | S28         |
| Fig. S32 | (a-b) FTIR patterns of original sample of <b>Cd-MOF</b> (black) and the recovered sample of <b>Cd-MOF</b> after each cycle of quenching with 4-NP and 4-NT.                                                                                                                                                                                                                                      | S29         |
| Fig. S33 | (a-b) PXRD patterns of original sample of <b>Cd-MOF</b> (experimental, red trace; simulated, black) and the recovered sample of <b>Cd-MOF</b> after each cycle of quenching with 4-NP and 4-NT.                                                                                                                                                                                                  | S30         |
| Fig. S34 | (a-b) Lifetime decay curves of <b>Cd-MOF</b> before and after the addition of 4-NP and 4-NT, respectively.                                                                                                                                                                                                                                                                                       | S31         |
| Fig. S35 | Theoretically optimized HOMO and LUMO energies of <b>L<sup>4-py</sup></b> , H <sub>2</sub> nipa and examined nitroaromatics using the B3LYP/6-31G protocol.                                                                                                                                                                                                                                      | S32         |
| Fig. S36 | (a) XPS spectrum of <b>Cd-MOF</b> before sensing. (b-d) XPS spectrum of <b>Cd-MOF</b> for N 1s, O 1s, S 2p before sensing. (e) XPS spectrum of <b>Cd-MOF</b> after sensing 4-NP. (f-h) XPS spectrum of <b>Cd-MOF</b> for N 1s, O 1s, S 2p after sensing 4-NP. (i) XPS spectrum of <b>Cd-MOF</b> after sensing 4-NT. (j-l) XPS spectrum of <b>Cd-MOF</b> for N 1s, O 1s, S 2p after sensing 4-NT. | S33         |
| Table S1 | Crystal data and structure refinement for <b>L<sup>4-py</sup></b> and <b>Cd-MOF</b> .                                                                                                                                                                                                                                                                                                            | S34         |
| Table S2 | Selected bond length and angles for <b>Cd-MOF</b> .                                                                                                                                                                                                                                                                                                                                              | S35         |
| Table S3 | Hydrogen bonds for ligand <b>L<sup>4-py</sup></b> .                                                                                                                                                                                                                                                                                                                                              | S36         |
| Table S4 | Hydrogen bonds for <b>Cd-MOF</b> .                                                                                                                                                                                                                                                                                                                                                               | S36         |
| Table S5 | Fluorescence quantum yields of the <b>L<sup>4-py</sup></b> , co-ligand H <sub>2</sub> nipa and <b>Cd-MOF</b> .                                                                                                                                                                                                                                                                                   | S36         |
| Table S6 | Stern-Volmer (SV) quenching constant and detection limits of all examined analytes.                                                                                                                                                                                                                                                                                                              | S37         |
| Table S7 | A comparative list of various fluorescent MOFs including <b>Cd-MOF</b> that have been used for sensing of various nitro aromatic compounds (NACs).                                                                                                                                                                                                                                               | S38         |
| Table S8 | Integral Orbital Overlap J( $\lambda$ ) values of nitro-analytes.                                                                                                                                                                                                                                                                                                                                | S39         |
|          | Calculation of extent of overlapping.                                                                                                                                                                                                                                                                                                                                                            | S39         |
|          | References                                                                                                                                                                                                                                                                                                                                                                                       | S39-<br>S40 |

**Synthesis of ligand N, N'-(thiobis(4,1-phenylene)) diisonicotinamide ( $L^{4-py}$ ).**<sup>S1</sup> The ligand  $L^{4-py}$  has been synthesized using isonicotinic acid (0.227 g, 0.92 mmol) and 4,4'-thiodianiline (0.100 g, 0.46 mmol) which were dissolved in pyridine (3 mL) and heated at 90 °C for 40 min (Scheme S1). After heating the solution triphenylphosphite (TPP) (0.241 mL, 0.92 mmol) was added drop wise and the reaction was stirred for 8 h. The progress of the reaction was monitored by thin-layer chromatography (TLC). After completion of the reaction, ice-cold water was added to it and an off-white solid precipitated out filtered off and was washed with cold water several times followed by diethyl ether. The precipitates were dried at 60 °C for 12 h in an oven. Yield (0.180 g, 91 %; based on 4,4'-thiodianiline). FT-IR spectrum (selected peaks;  $\nu$  cm<sup>-1</sup>): 3288 (N-H), 1647, 1590 (C=O<sub>amide</sub>). <sup>1</sup>H NMR (500 MHz, DMSO-*d*<sub>6</sub>);  $\delta_{ppm}$  7.35-7.37 (*d*, 4H, *J* = 8.7 Hz, H<sub>a</sub>), 7.85-7.86 (*d*, 4H, *J* = 6.0 Hz, H<sub>b</sub>), 7.80-7.81 (*d*, 4H, *J* = 8.7 Hz, H<sub>c</sub>), 8.78-8.80 (*d*, 4H, *J* = 5.9 Hz, H<sub>d</sub>), 10.60 (*s*, 2H, H<sub>e</sub>). <sup>13</sup>C NMR (126 MHz, DMSO-*d*<sub>6</sub>)  $\delta_{ppm}$  163.96, 150.17, 141.64, 137.93, 131.26, 129.88, 121.45, 121.24.

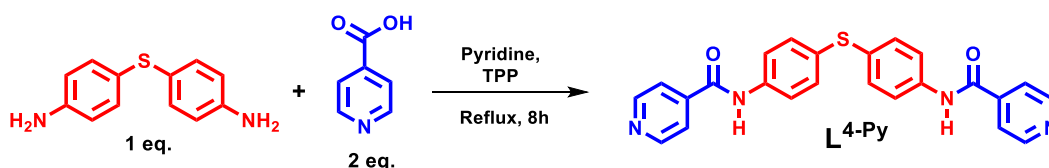

**Scheme S1.** Synthesis of ligand N, N'-(thiobis(4,1-phenylene)) diisonicotinamide ( $L^{4-py}$ ).

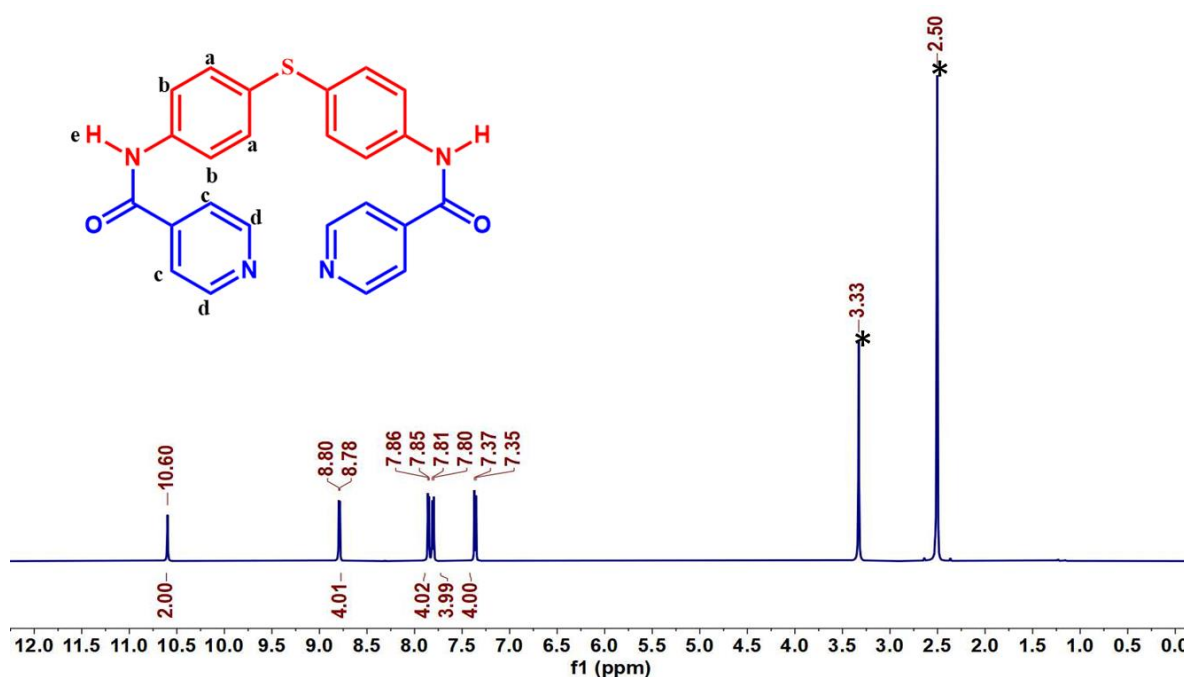

**Fig. S1.** <sup>1</sup>H NMR spectrum of ligand  $L^{4-py}$  in DMSO-*d*<sub>6</sub>. \*Represents the residual water peak is at 3.33 ppm.

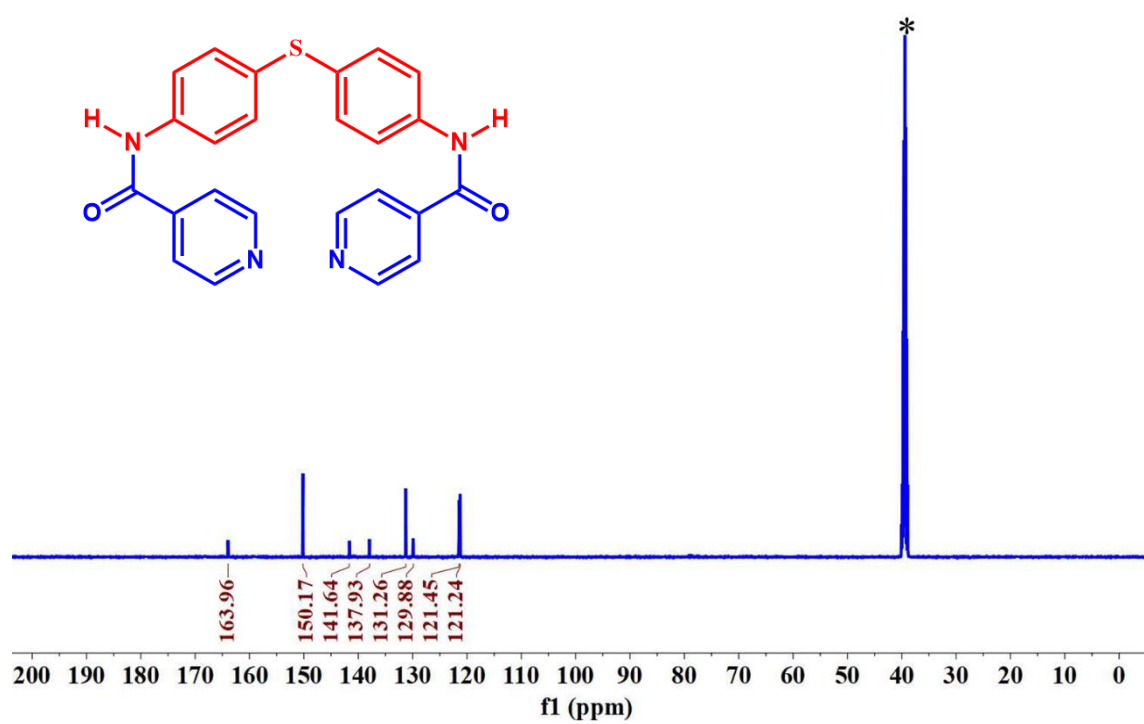

**Fig. S2.** <sup>13</sup>C NMR spectrum of ligand **L<sup>4-py</sup>** in DMSO-*d*<sub>6</sub>. \*Represents the solvent residual peak.

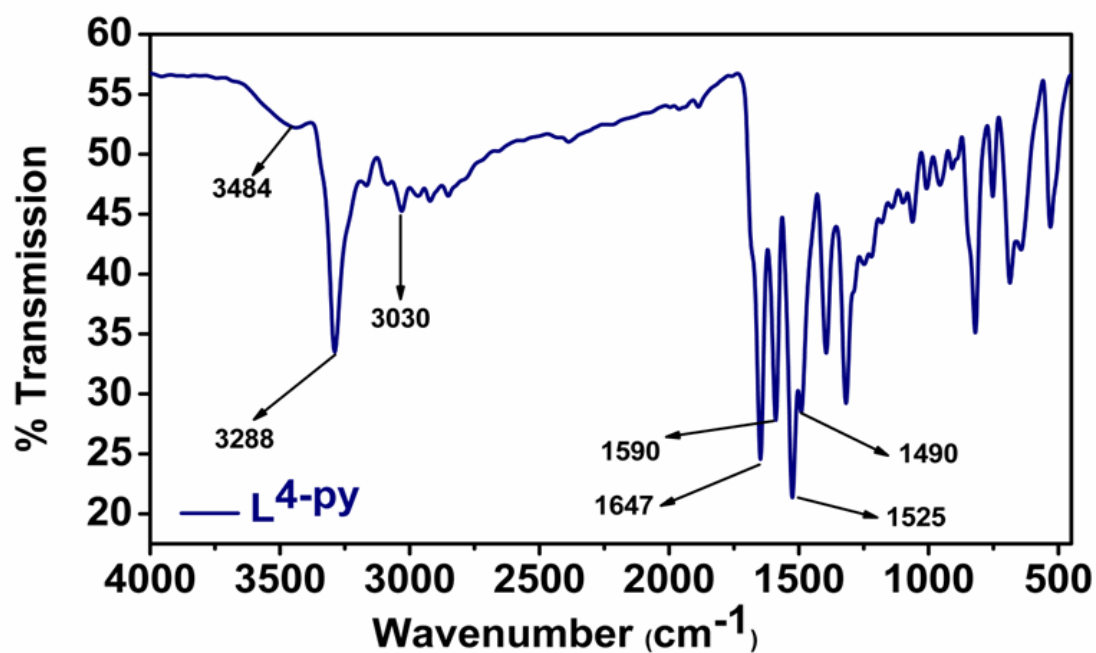

Fig. S3. FT-IR spectrum of ligand L<sup>4</sup>-py.

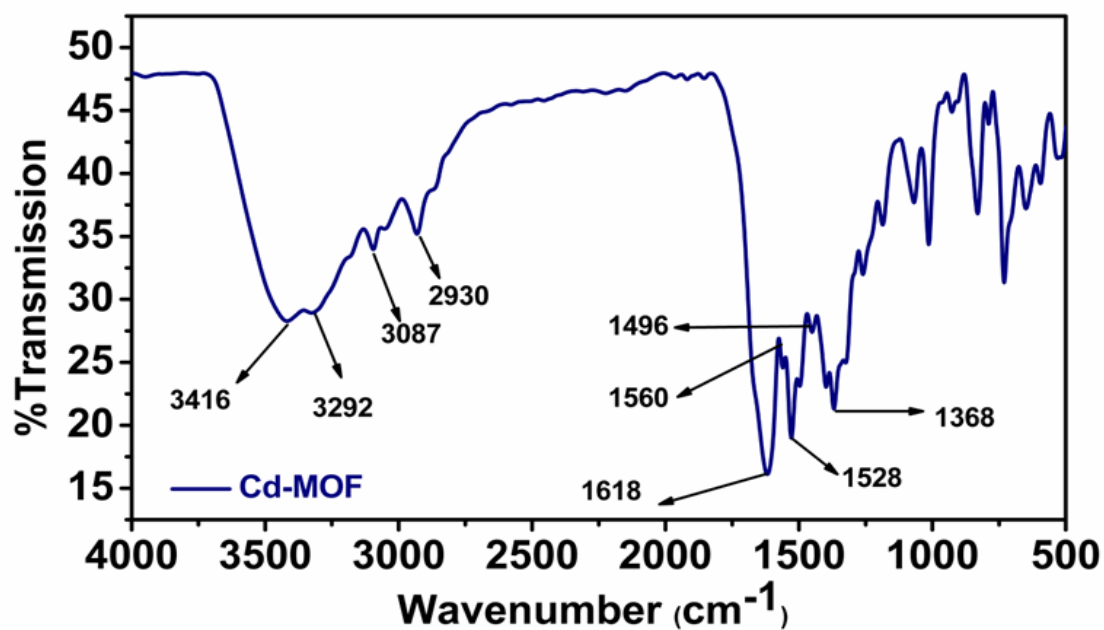

Fig. S4. FT-IR spectrum of Cd-MOF.

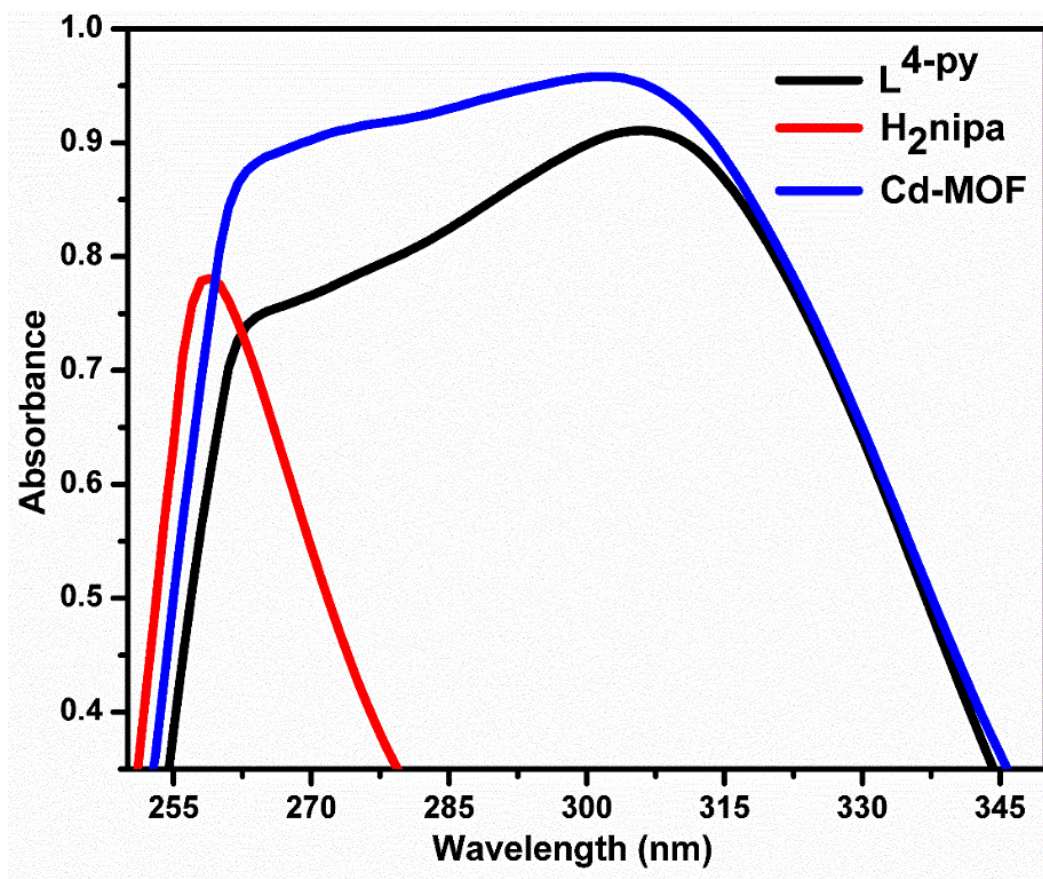

Fig. S5. UV-Visible spectra of ligand L<sup>4-py</sup>, co-ligand H<sub>2</sub>nipa and Cd-MOF in DMSO.

Deptt. of CIL , Panjab University Chandigarh

Company name: ThermoFinnigan  
 Analysed: 15-07-2024 14:10  
 Printed: 19-12-2024 15:03  
 Sample ID: Cd-MOF  
 Analysis type: UnkNown  
 Chromatogram filename: C:\CHNS-O\SAIF\CHNS\User 2024\July\15-7-2024\8.DAT  
 Calibration method: K Factors  
 Sample weight: 2.369

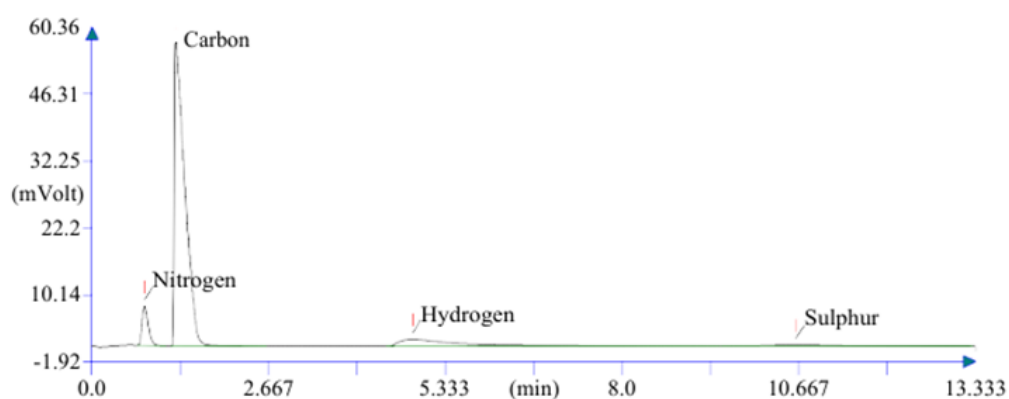

| Peak Number<br>(#) | Retent(ion Time<br>min) | Component Name | Element | % |
|--------------------|-------------------------|----------------|---------|---|
| 1                  | 0.800                   | Nitrogen       | 9.013   |   |
| 2                  | 1.267                   | Carbon         | 51.01   |   |
| 3                  | 4.842                   | Hydrogen       | 4.151   |   |
| 4                  | 10.625                  | Sulphur        | 3.336   |   |
|                    |                         |                | 67.51   |   |

Fig. S6. CHNS data of Cd-MOF.

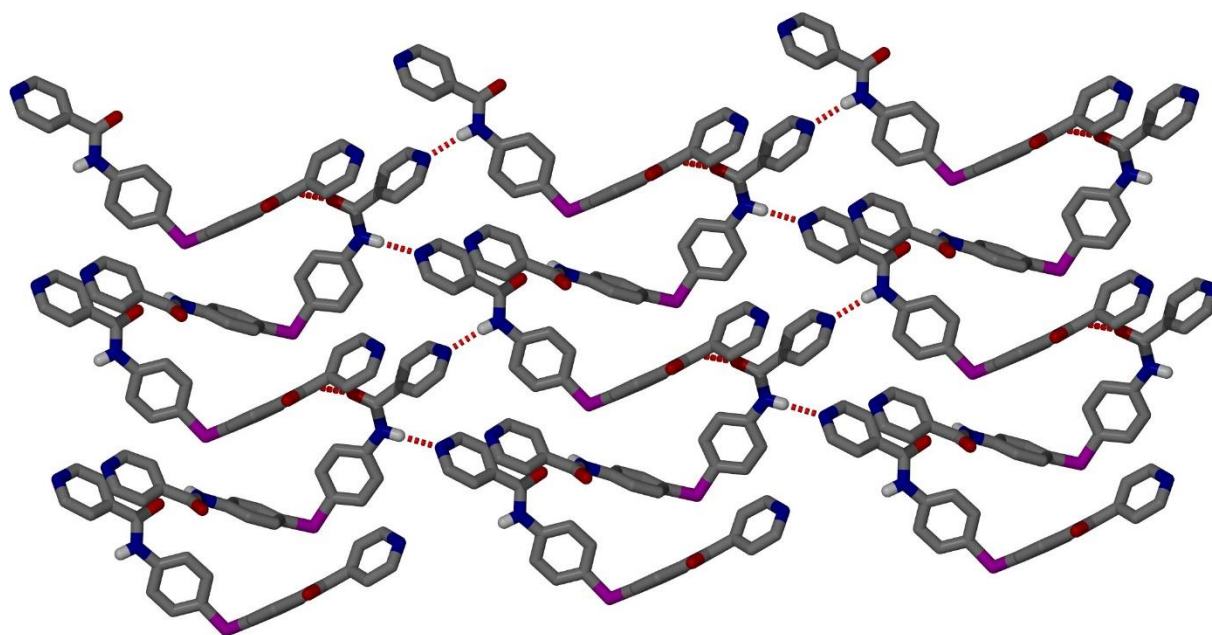

**Fig. S7.** H-bonding interactions involving N-H...N and N-H...O of amide functionalities of L<sup>4</sup>-Py.

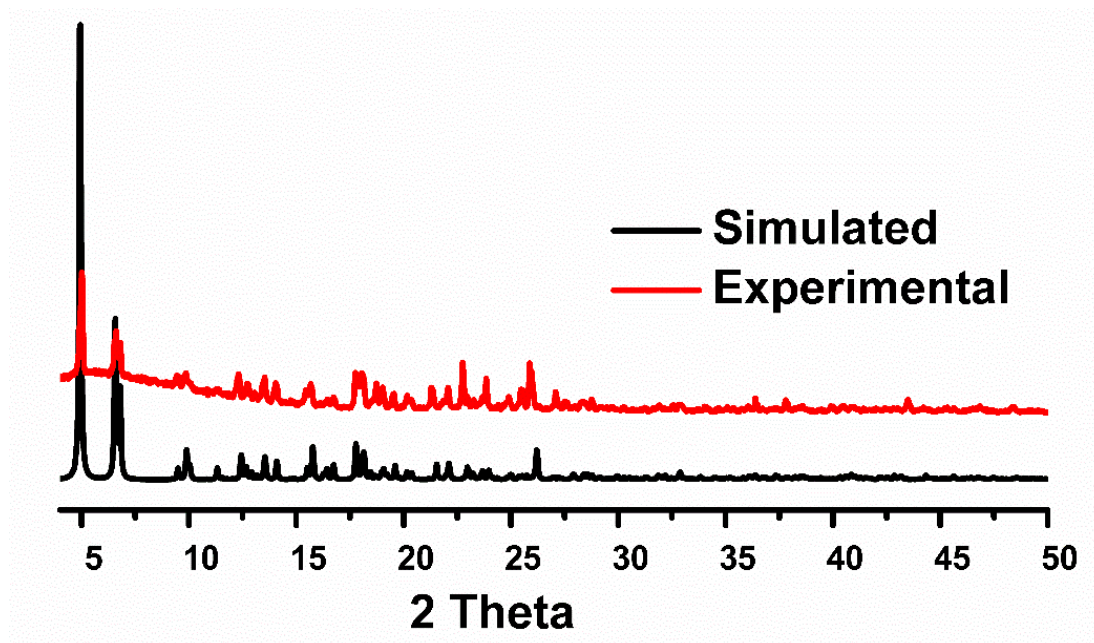

**Fig. S8.** PXRD pattern for Cd-MOF bulk sample (red trace) and the one simulated from the single crystal structure analysis (black trace).

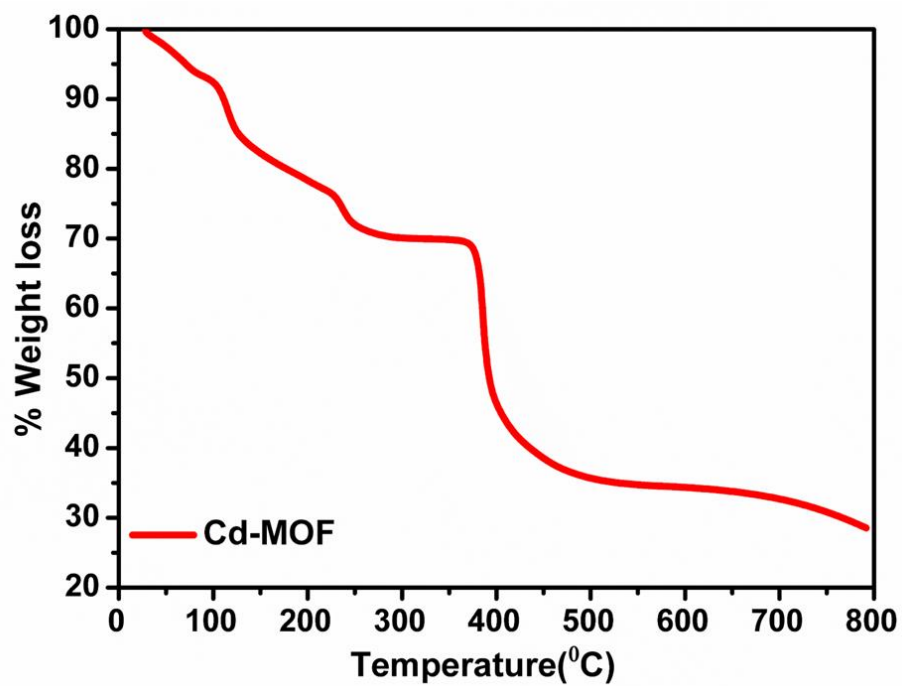

Fig. S9. TGA plot for Cd-MOF.

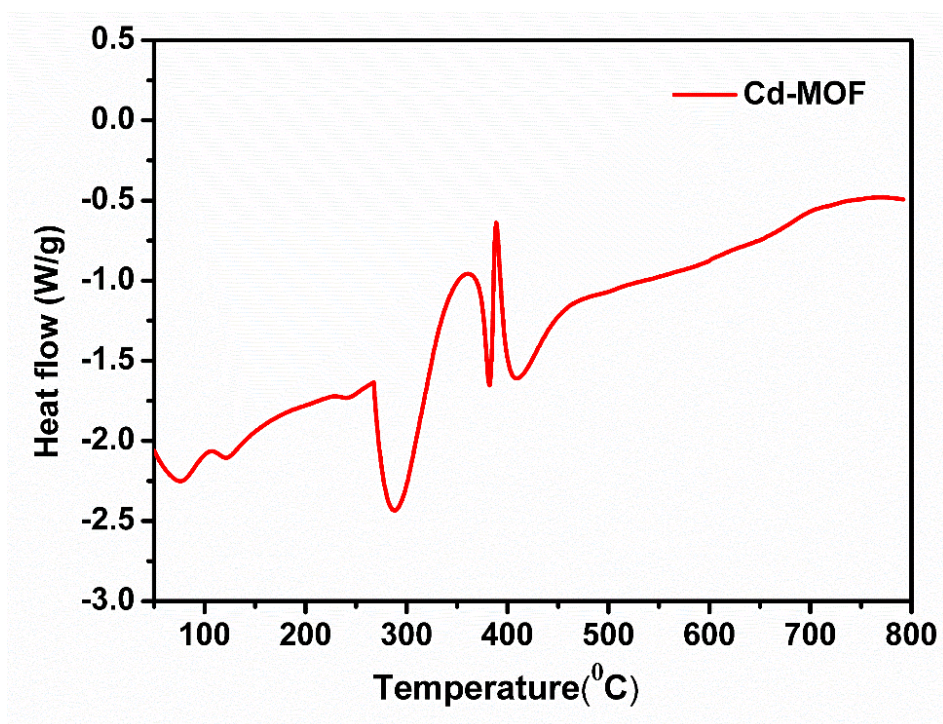

Fig. S10. DSC plot for Cd-MOF.

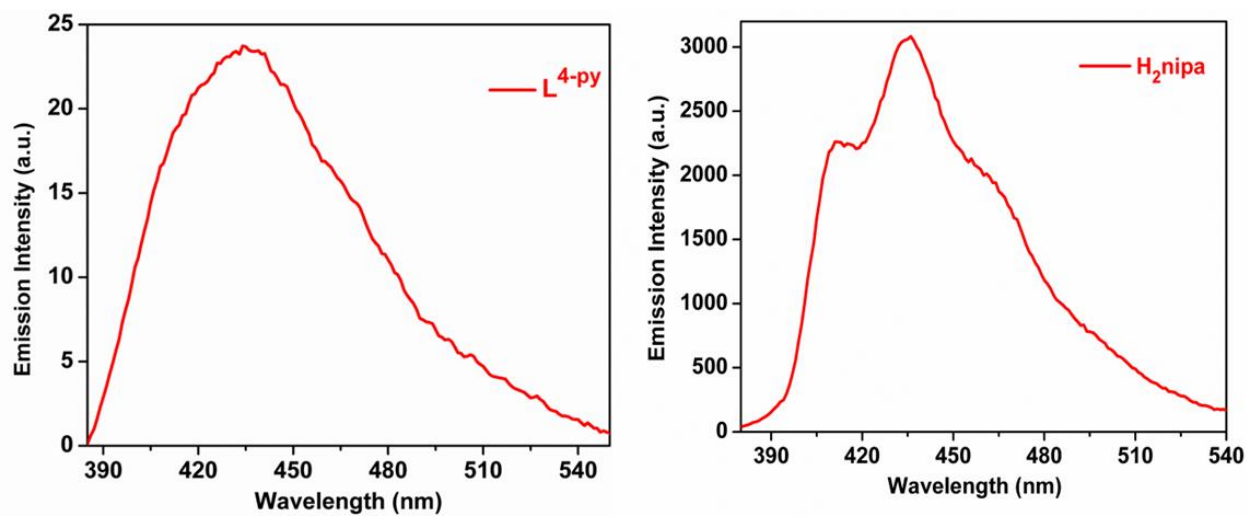

Fig. S11. Emission spectra of (a)  $L^{4-py}$  and (b) co-ligand  $H_2nipa$ .

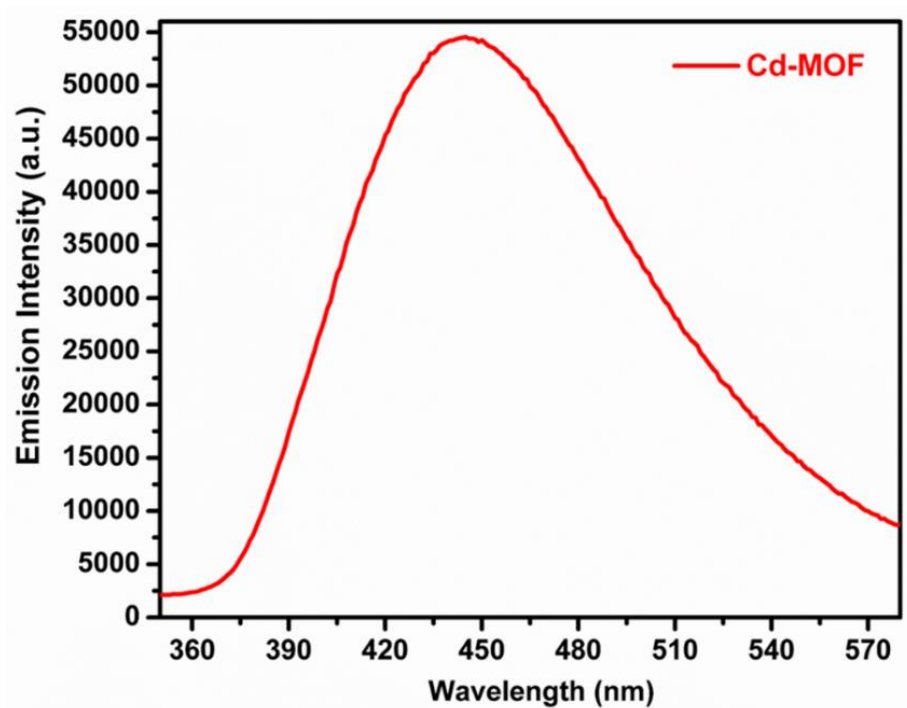

Fig. S12. Emission spectra Cd-MOF.

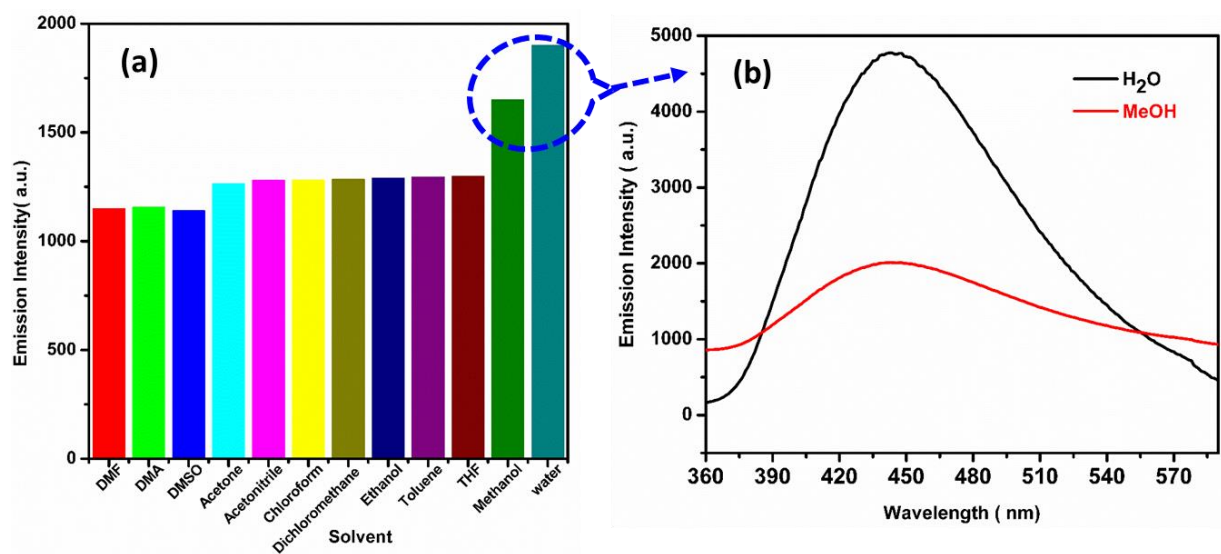

**Fig. S13.** (a) Emission Profile of **Cd-MOF** in different solvents. (b) Emission Profile of **Cd-MOF** in H<sub>2</sub>O and dry MeOH, wherein the highest emission intensity observed.

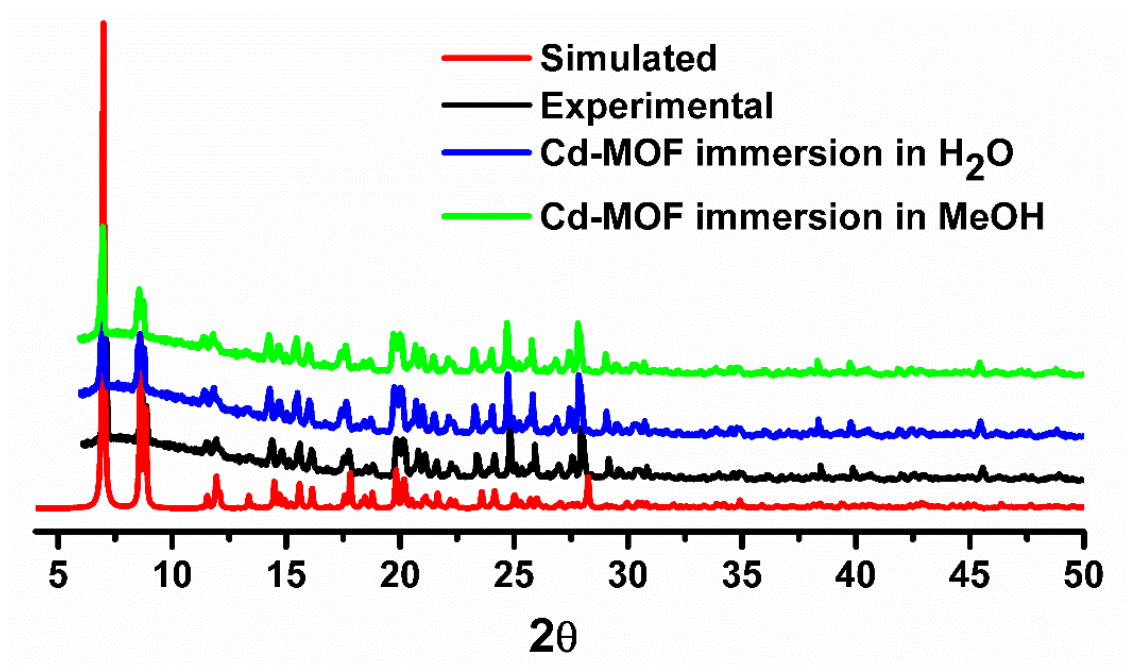

**Fig. S14.** PXRD pattern of **Cd-MOF** and the samples recovered after soaking in H<sub>2</sub>O and MeOH for 24 h.

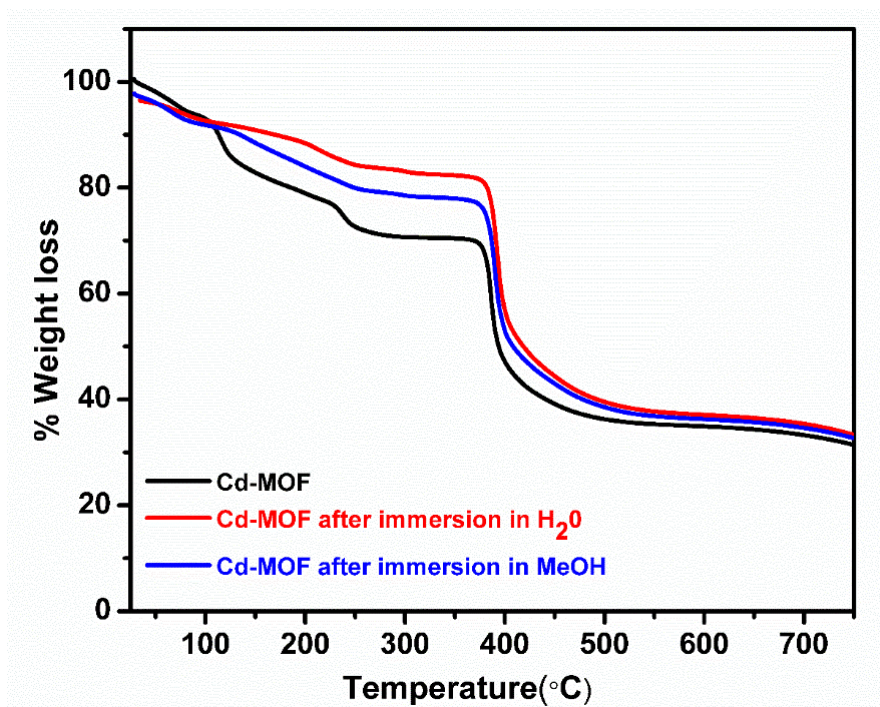

**Fig. S15.** TGA plot of **Cd-MOF** and the samples recovered after soaking in MeOH and H<sub>2</sub>O for 24 h.

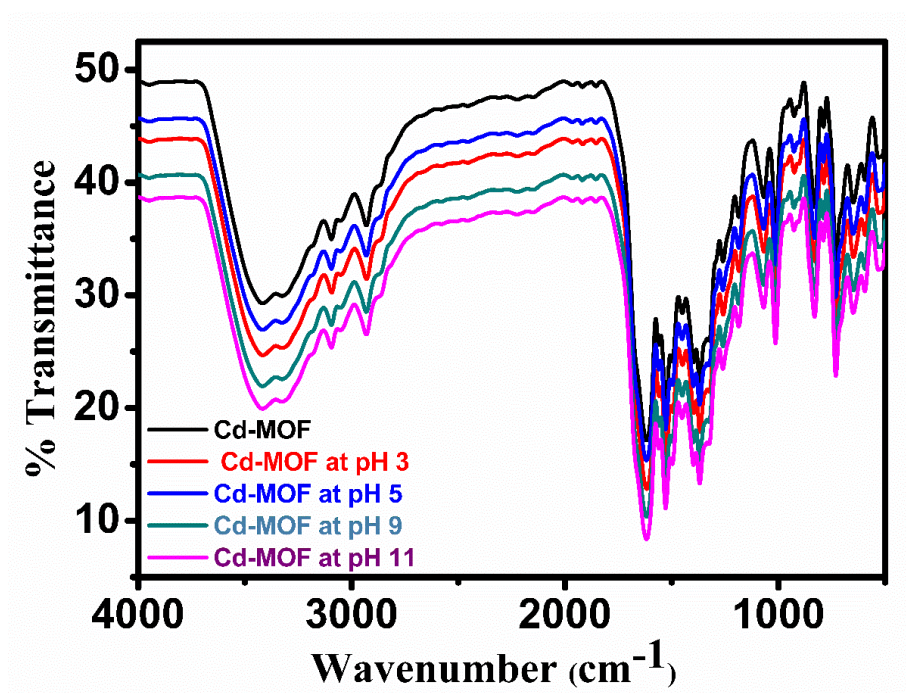

**Fig. S16.** FT-IR spectrum of **Cd-MOF** and the samples recovered after soaking in H<sub>2</sub>O at different pH for 24 h.

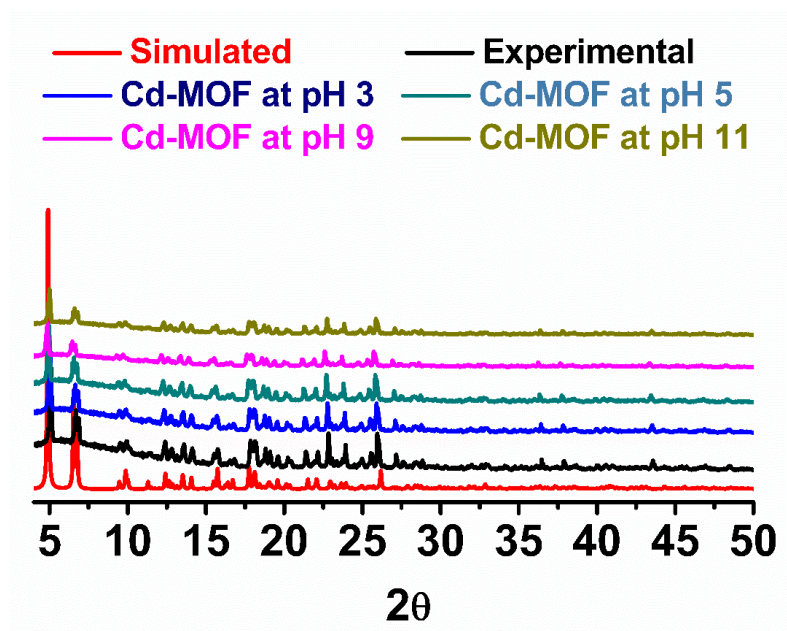

**Fig. S17.** PXRD patterns of **Cd-MOF** and the samples recovered after soaking in  $\text{H}_2\text{O}$  at different pH for 24 h.

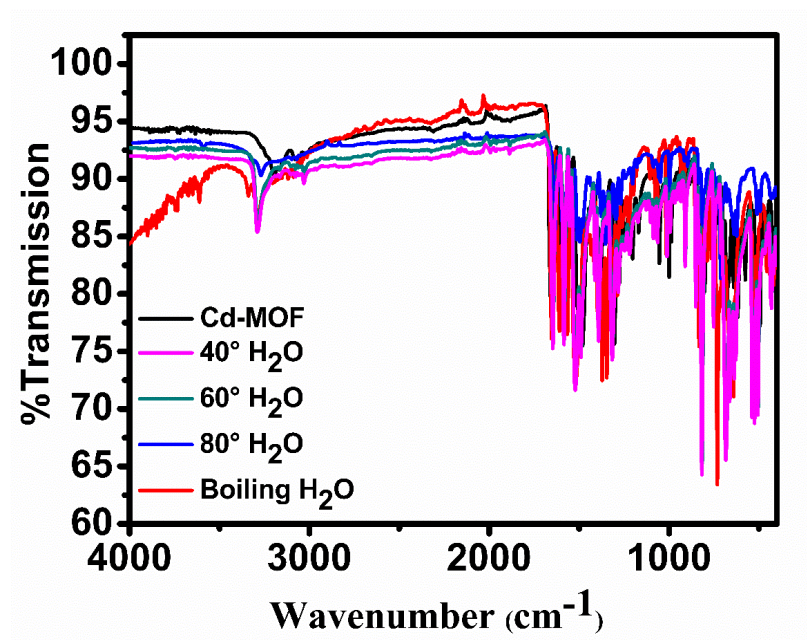

**Fig. S18.** FT-IR spectrum of **Cd-MOF** and the samples recovered after soaking in  $\text{H}_2\text{O}$  at different temperature for 24 h.

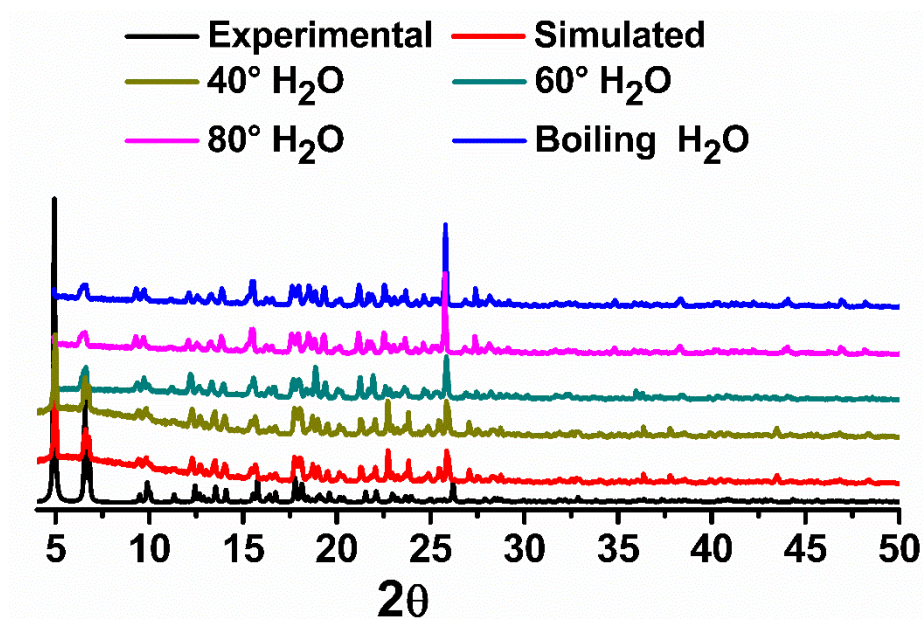

**Fig. S19.** PXRD patterns of Cd-MOF and the samples recovered after soaking in H<sub>2</sub>O at different temperature for 24 h.

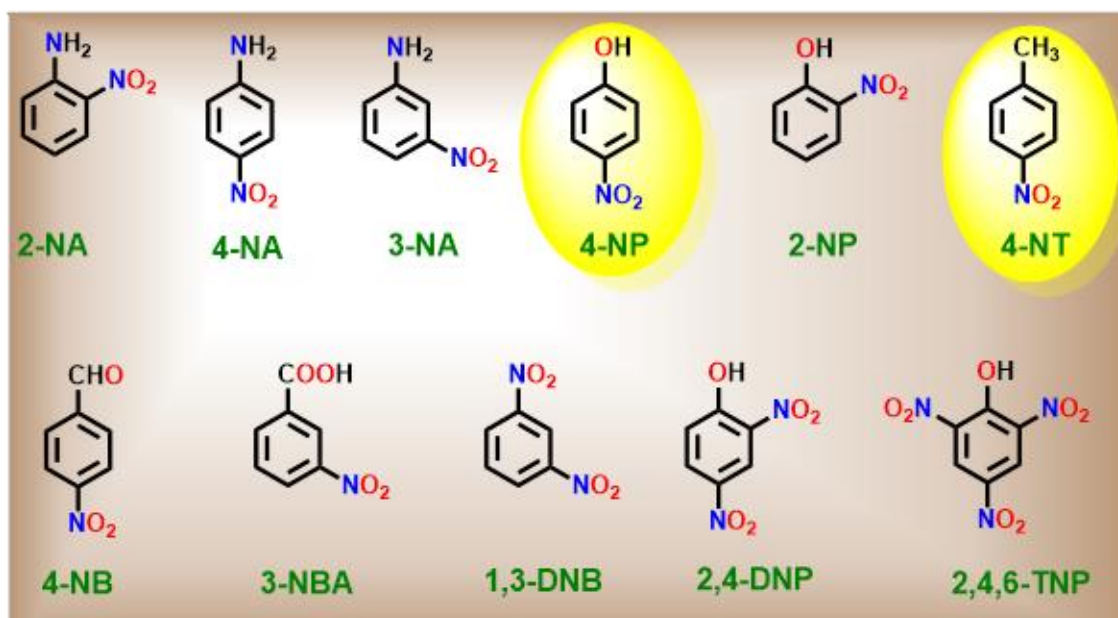

**Chart S1.** Chemical structures of nitroaromatics compounds used in the present sensing study.

**Stern–Volmer constant ( $K_{SV}$ ) and detection limit calculation:**

Estimation of fluorescence titrations using the following Stern-Volmer equation.<sup>S2</sup>

$$I_0/I = 1 + K_{SV}[A] \quad (1)$$

Where,  $I_0$  = emission intensity without analyte

$I$  = emission intensity with analyte

$[A]$  = molar concentration of the analyte

$K_{SV}$  = Stern-Volmer constant

The limit of detection (LOD) for the organic amine analytes were calculated using equation

$$\text{Detection limit: } 3\sigma/k \quad (2)$$

Where,  $\sigma$  = standard deviation calculated from the blank measurements

$k$  = slope of the titration plot of emission intensity

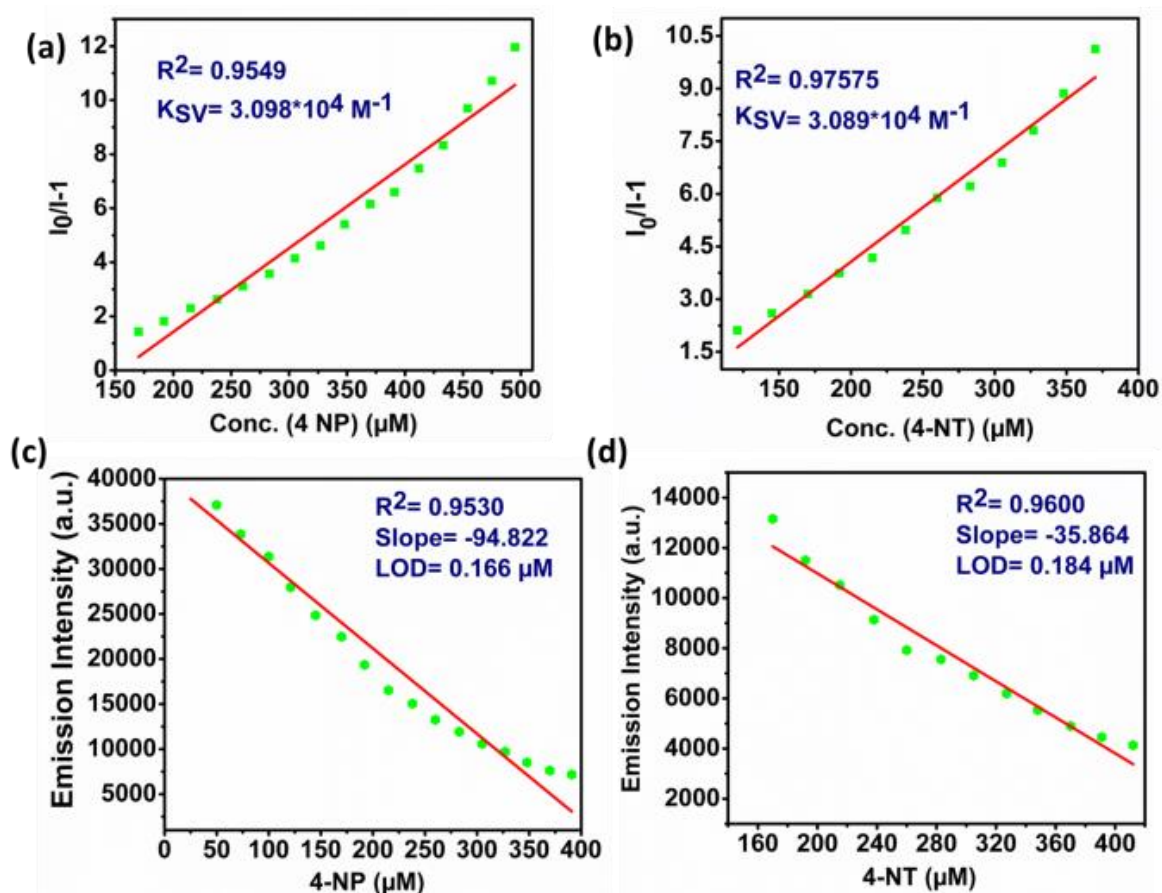

**Fig. 20.** (a, b) S-V plot for the recognition of 4-NP and 4-NT respectively. (c, d) Limit of detection calculation plots for the sensing of 4-NP and 4-NT by Cd-MOF.

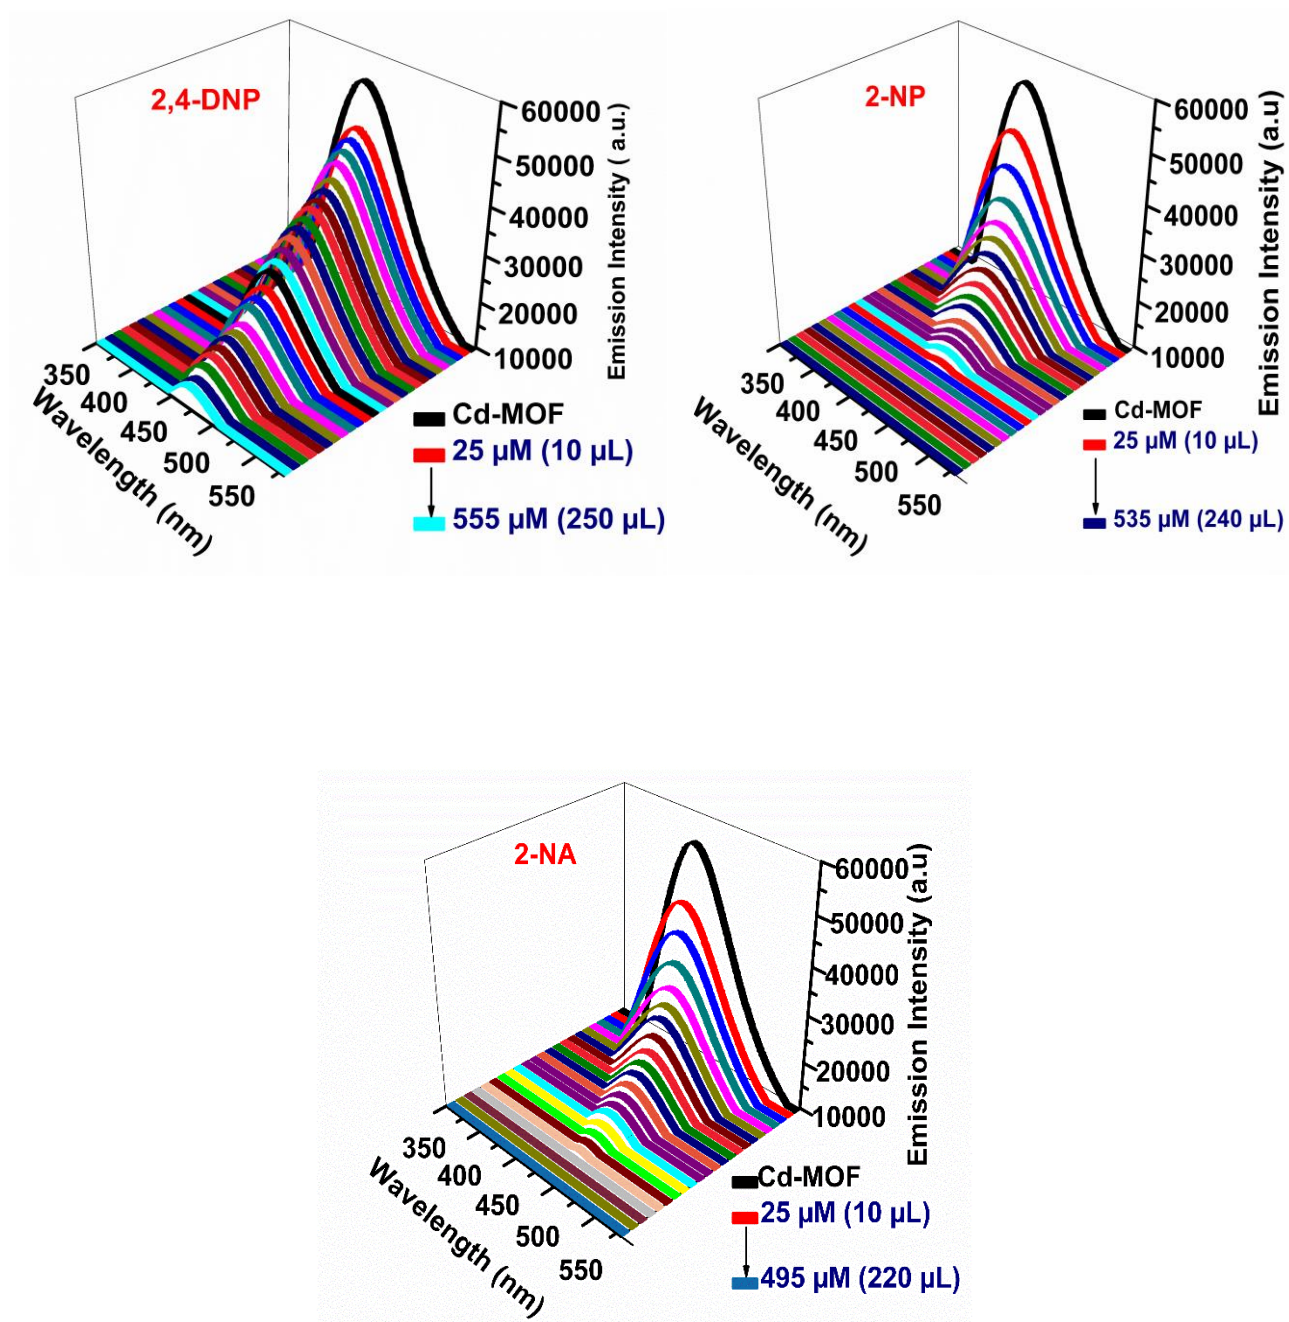

**Fig. S21.** The relative fluorescence intensity of **Cd-MOF** upon addition of solution of 2,4-DNP, 2-NP, 2-NA respectively.

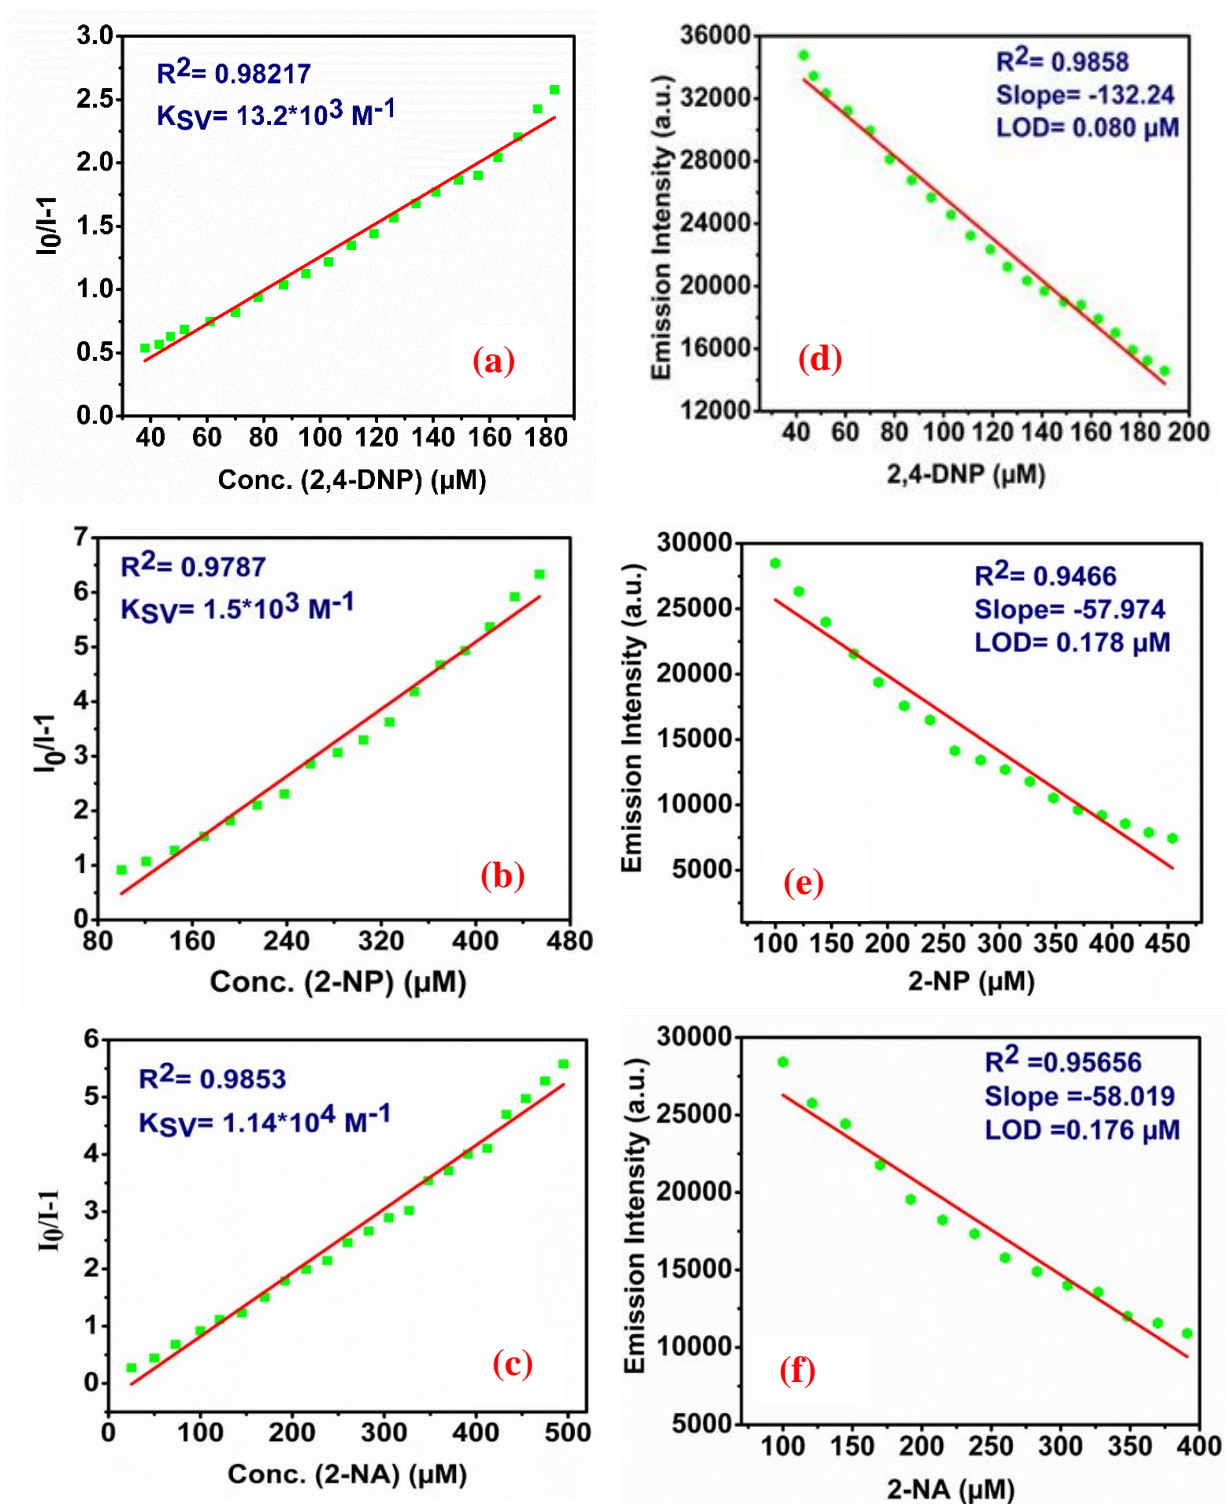

**Fig. S22.** (a-c) S-V plot for the recognition of 2,4-DNP, 2-NP and 2-NA respectively. (d-f) Limit of detection calculation plots for the sensing of 2,4-DNP, 2-NP and 2-NA analytes by **Cd-MOF** respectively.

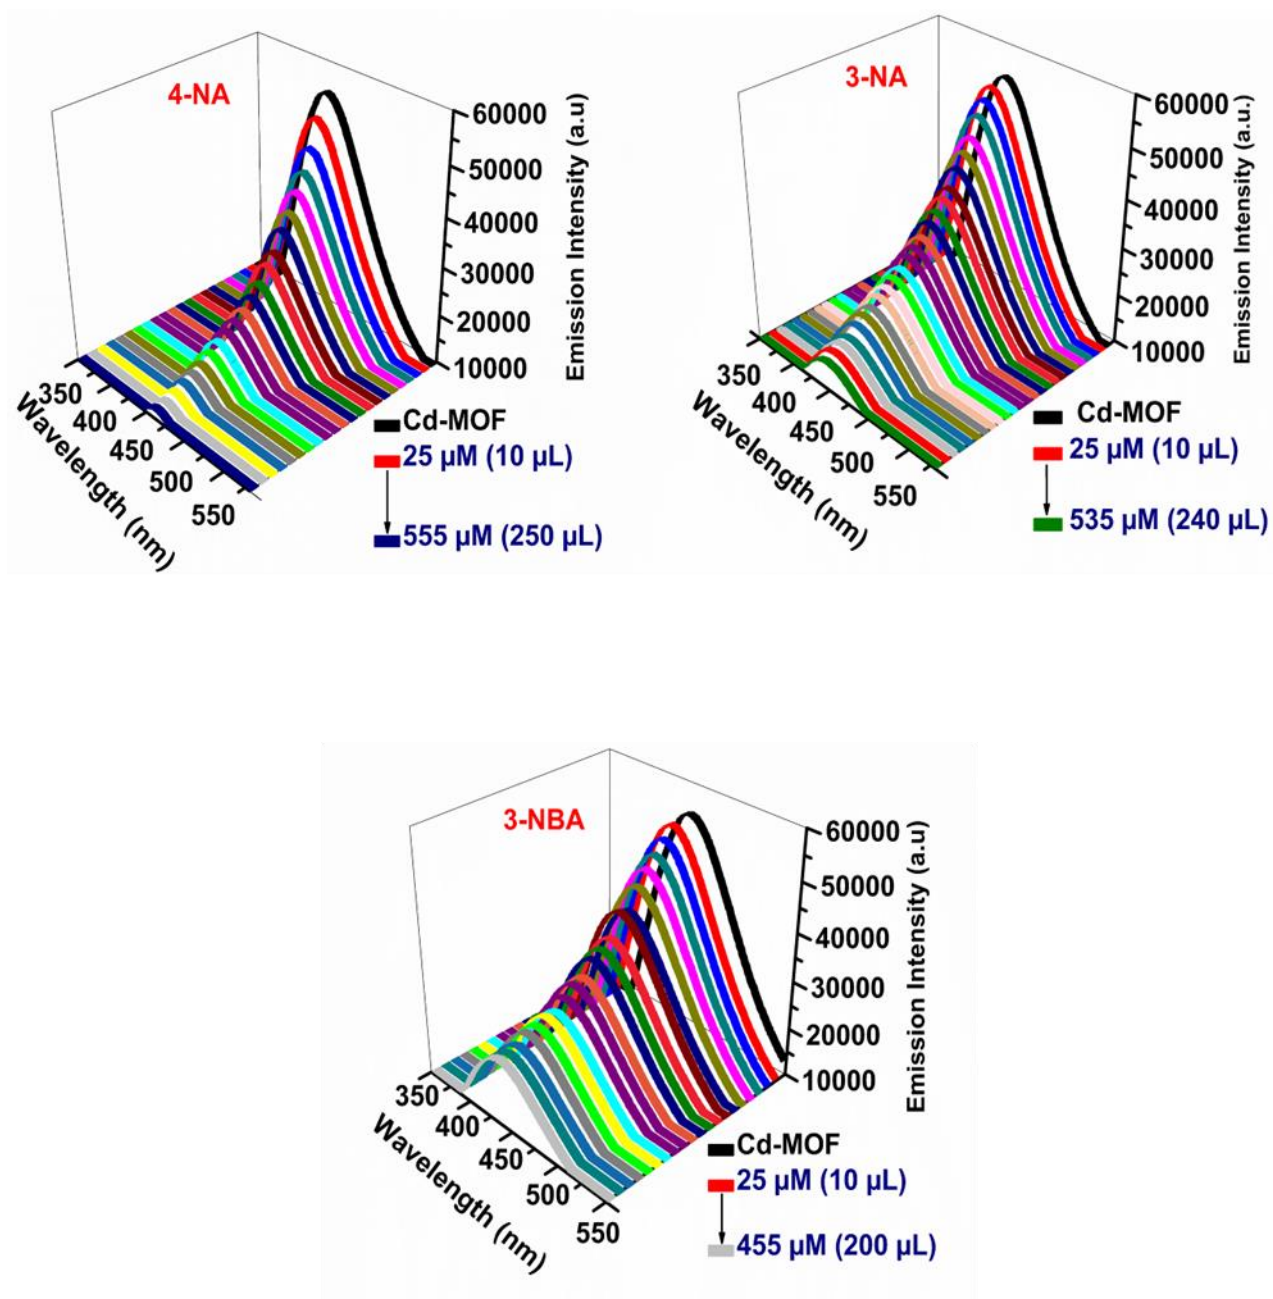

**Fig. S23.** The relative fluorescence intensity of **Cd-MOF** upon addition of solution of 4-NA, 3-NA, 3-NBA respectively.

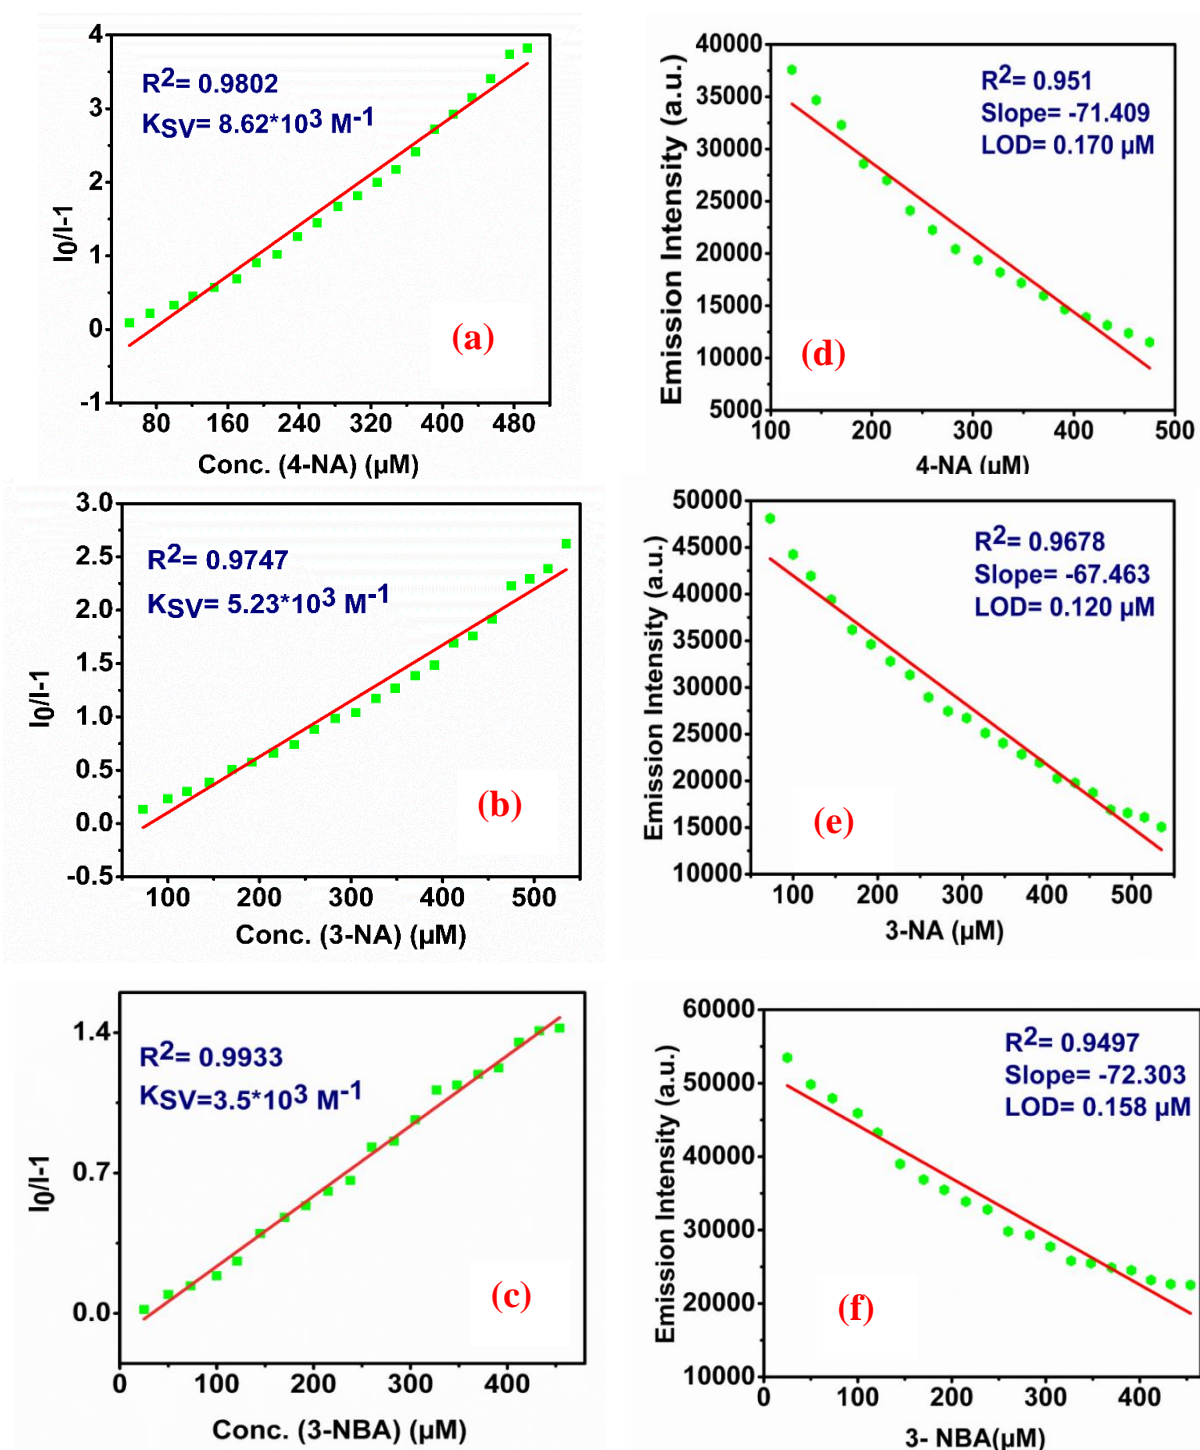

**Fig. S24.** (a-c) S-V plot for the recognition of 4-NA, 3-NA and 3-NBA respectively. (d-f) Limit of detection calculation plots for the sensing of 4-NA, 3-NA and 3-NBA analytes by **Cd-MOF** respectively.

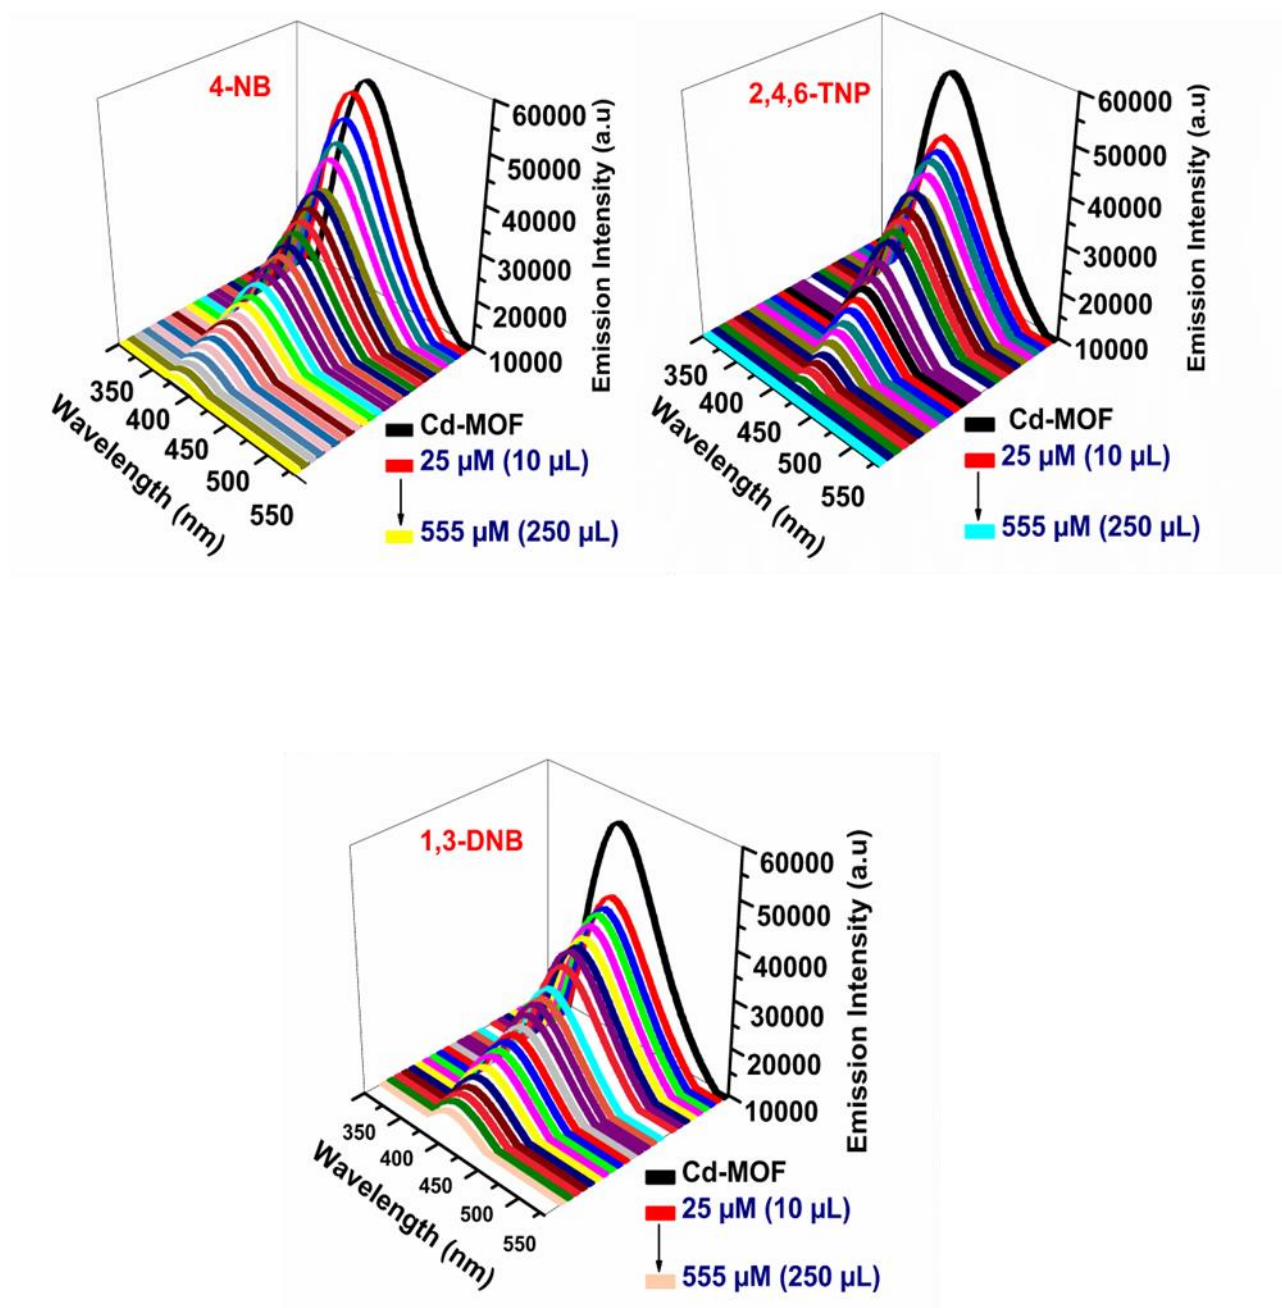

**Fig. S25.** The relative fluorescence intensity of **Cd-MOF** upon addition of solution of 4-NB, 2,4,6-TNP and 1, 3-DNB, respectively.

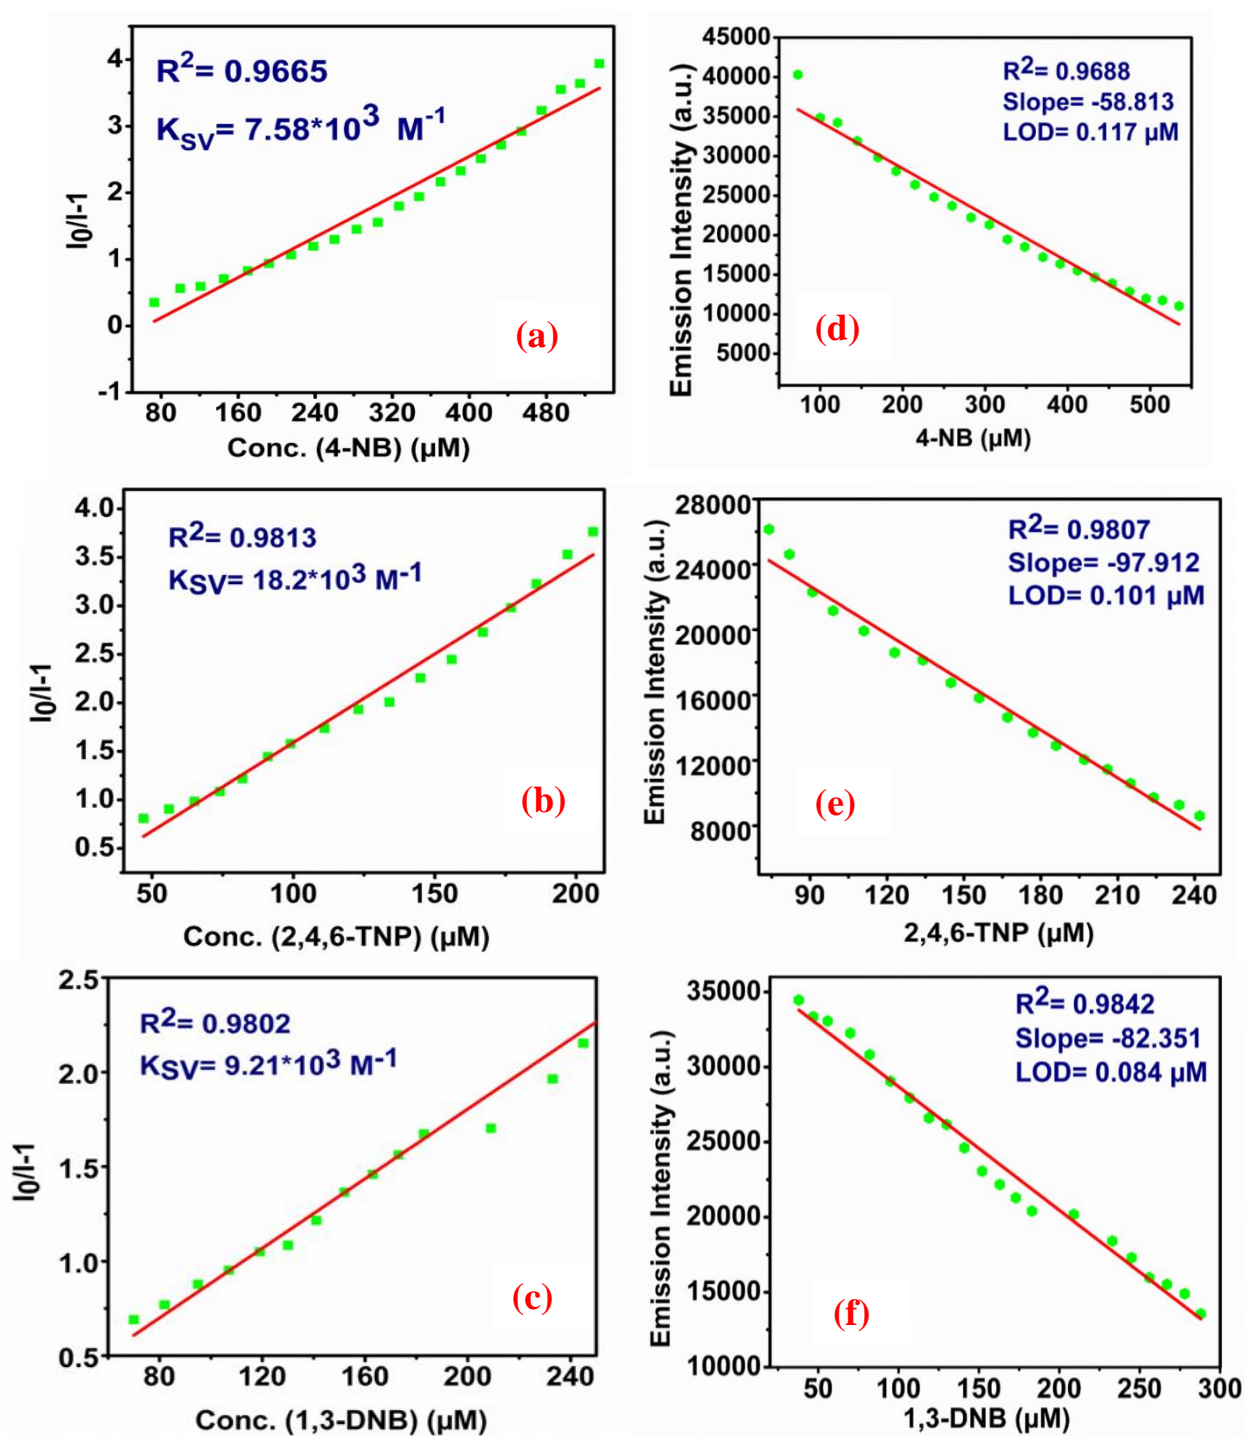

**Fig. S26.** (a-c) S-V plot for the recognition of 4-NB, 2,4,6-TNP and 1,3-DNB respectively. (d-f) Limit of detection calculation plots for the sensing of 4-NB, 2,4,6-TNP and 1,3-DNB analytes by Cd-MOF respectively.

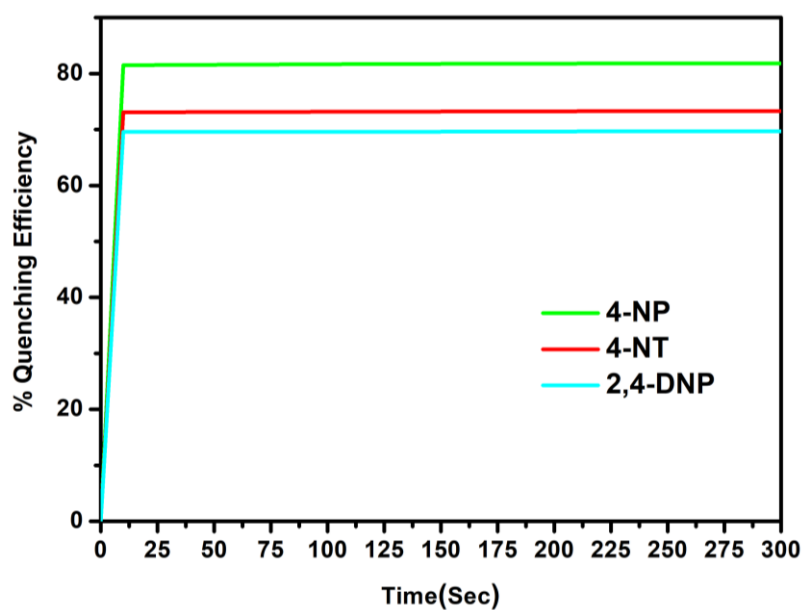

**Fig. S27.** Time dependent fluorescence response of **Cd-MOF** towards 4-NP, 4-NT and 2,4-DNP.

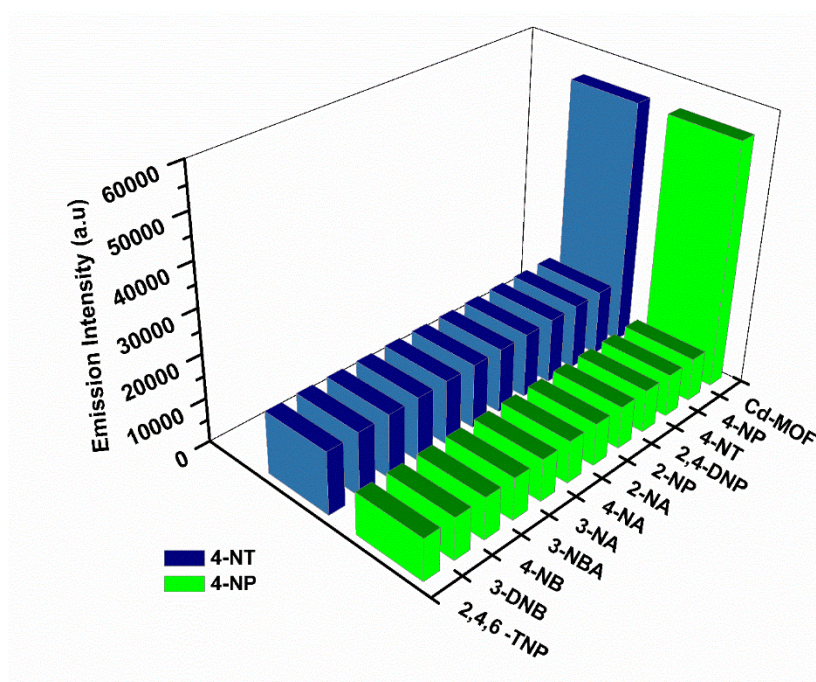

**Fig. S28.** Relative emission intensity of **Cd-MOF** upon addition of 50 µL of 4-NP and 4-NT (from 10 mM stock solution) in the presence of 50 µL of other nitroaromatics in CH<sub>3</sub>OH.

### Calculation of binding constant using Benesi-Hildebrand and fluorescence method:

Calculation of binding constant using Benesi-Hildebrand and fluorescence method: The value of binding constant of organic amines with **Cd-MOF** has been determined from the emission intensity data following the modified Benesi–Hildebrand equation.<sup>53</sup>

$$1/\Delta I = 1/\Delta I_{\max} + (1/K_b[C])(1/\Delta I_{\max}) \quad (3)$$

Here,  $\Delta I = I - I_{\min}$  and  $\Delta I_{\max} = I_{\max} - I$ , where  $I_{\min}$ ,  $I$ , and  $I_{\max}$  are the emission intensities of sensor material measured in the absence of concern analytes, at an intermediate analyte's concentration, and at a concentration of complete saturation.

Whereas,  $K_b$  and  $[C]$  represent the binding constant and concentration of particular analytes, respectively. The  $K_b$  could be determined from the slope of a straight line of plot  $1/(A - A_0)$  against  $1/[\text{Analyte}]$ .

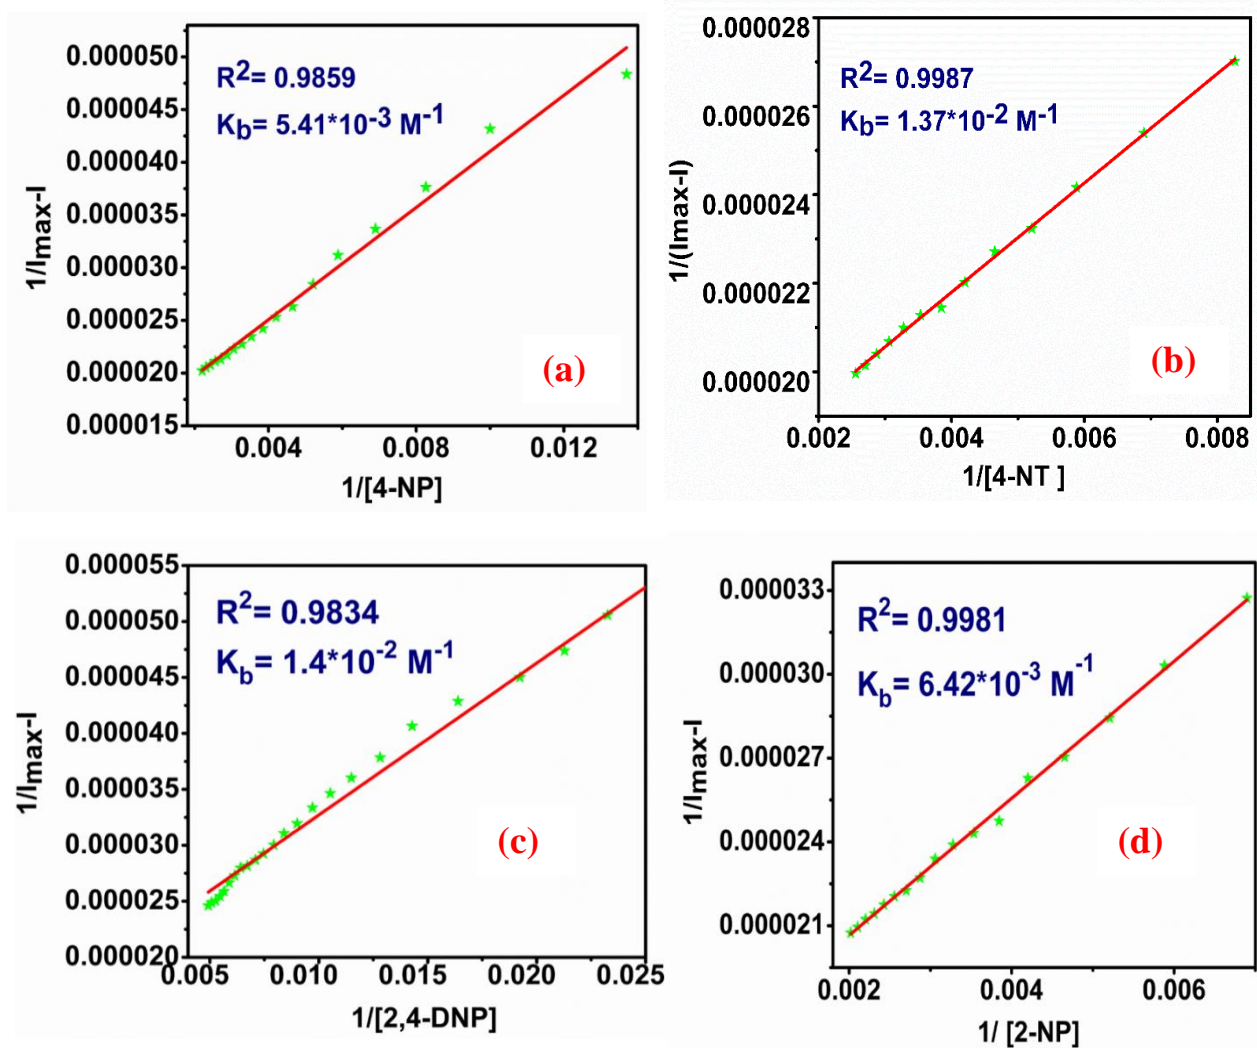

**Fig. S29.** (a-d) BH plot from the fluorescence titration data of receptor **Cd-MOF** (suspension) with 4-NP, 4-NT, 2,4-DNP and 2-NP respectively.

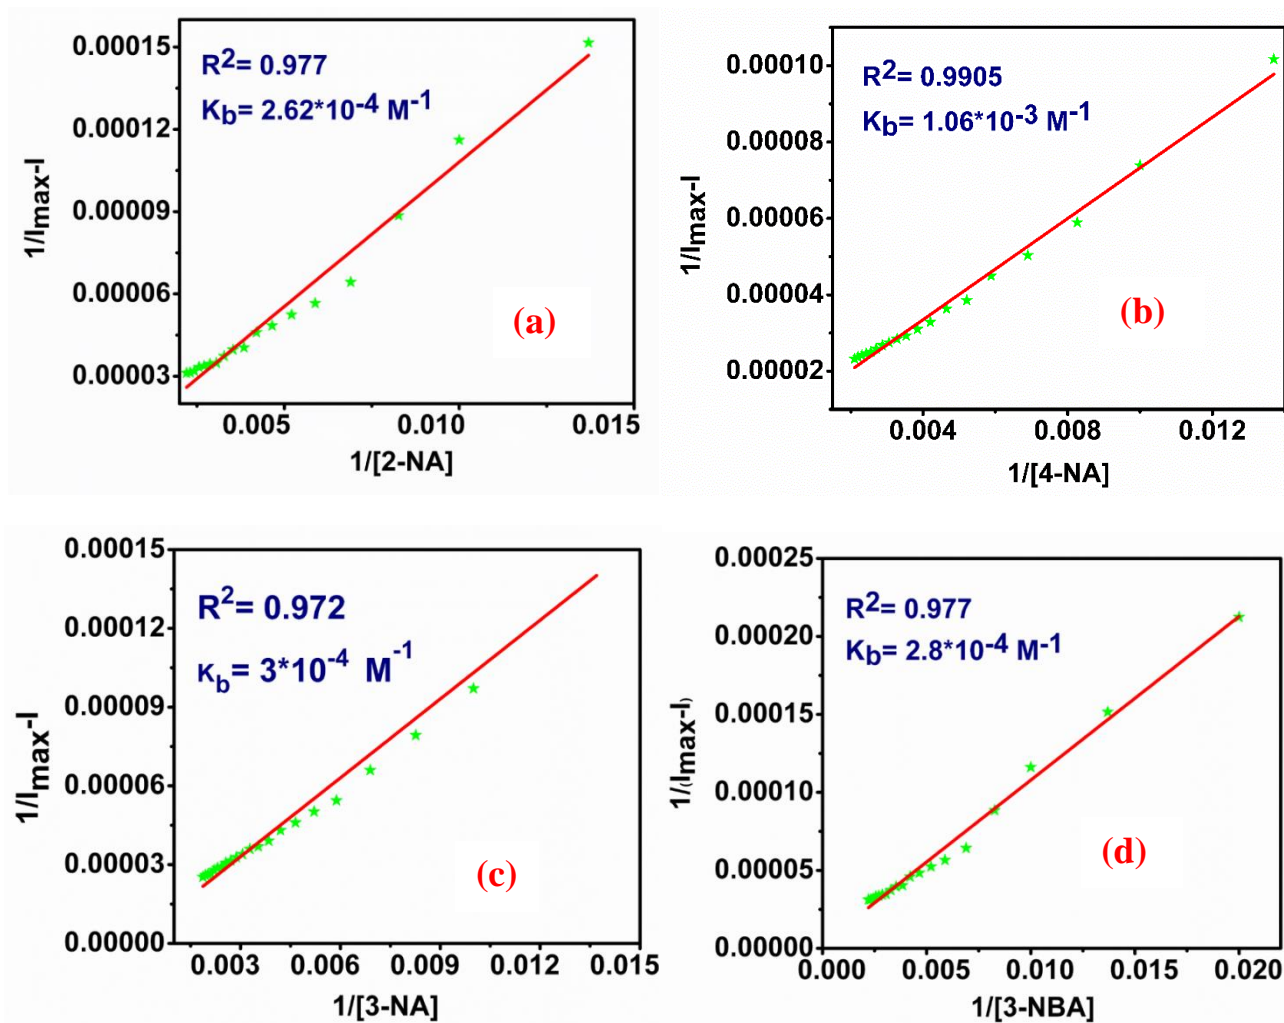

**Fig. S30.** (a-d) BH plot from the fluorescence titration data of receptor **Cd-MOF** (suspension) with 2-NA, 4-NA, 3-NA and 3-NBA respectively.

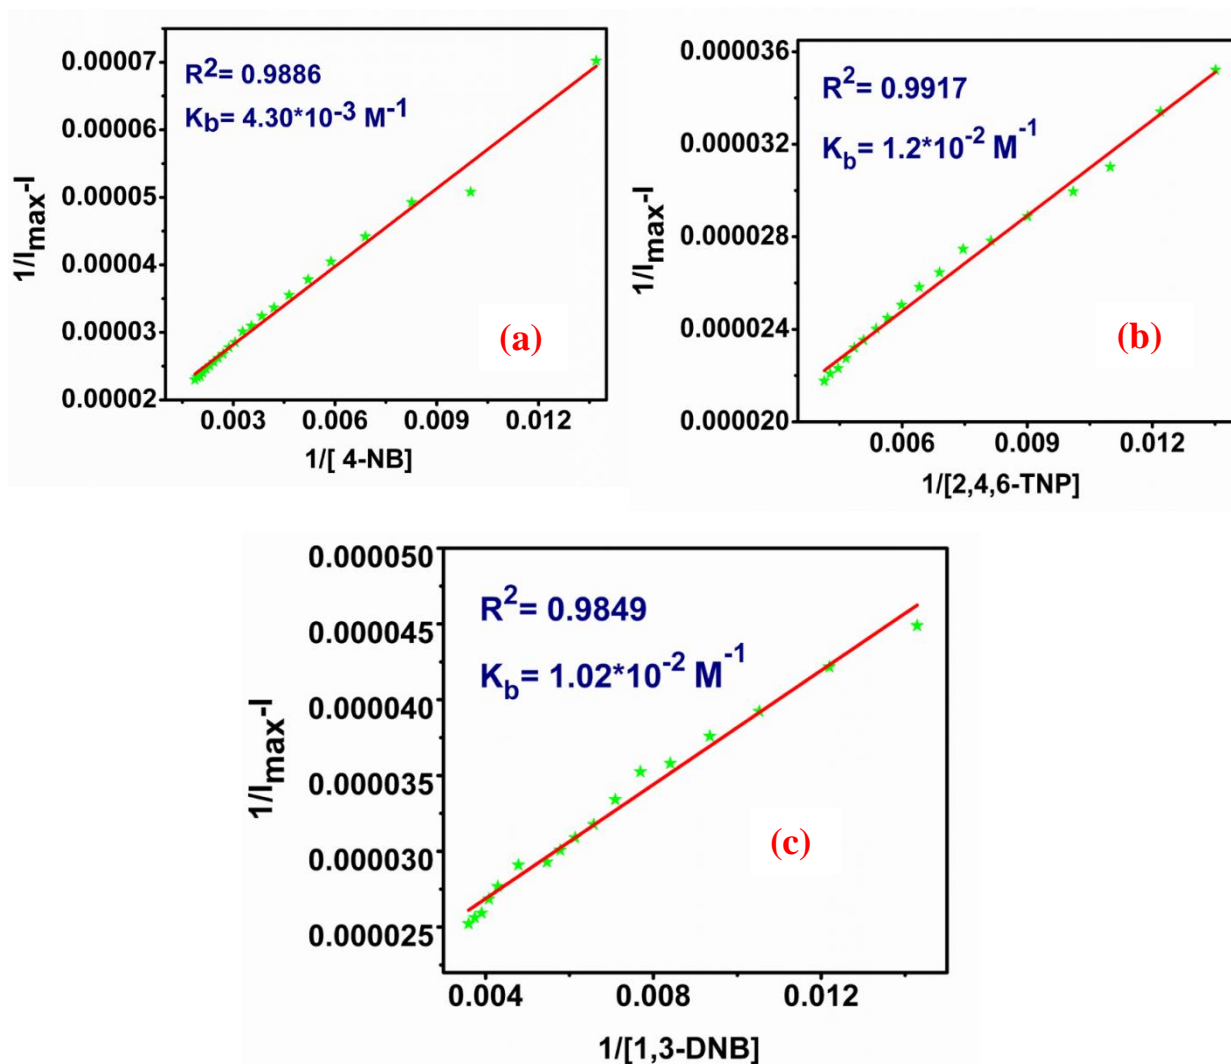

**Fig. S31.** (a-c) BH plot from the fluorescence titration data of receptor **Cd-MOF** (suspension) with 4-NB, 2,4,6-TNP and 1,3-DNB respectively.

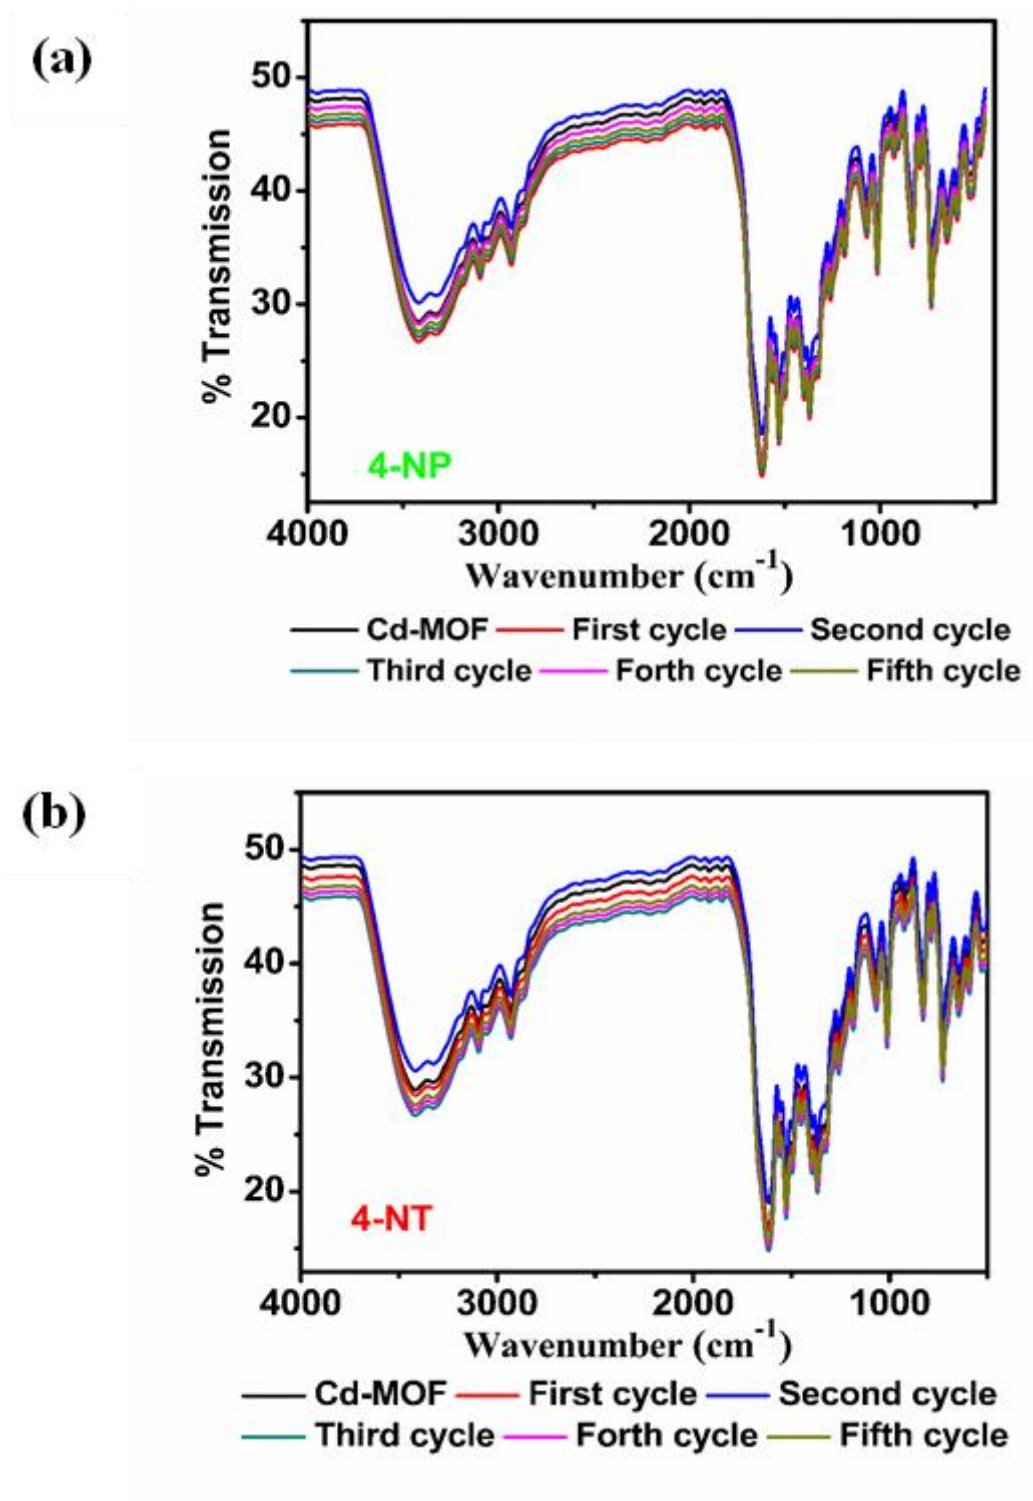

**Fig. S32.** (a-b) FT-IR patterns of original sample of **Cd-MOF** (black) and the recovered sample of **Cd-MOF** after each cycle of quenching with 4-NP and 4-NT respectively.

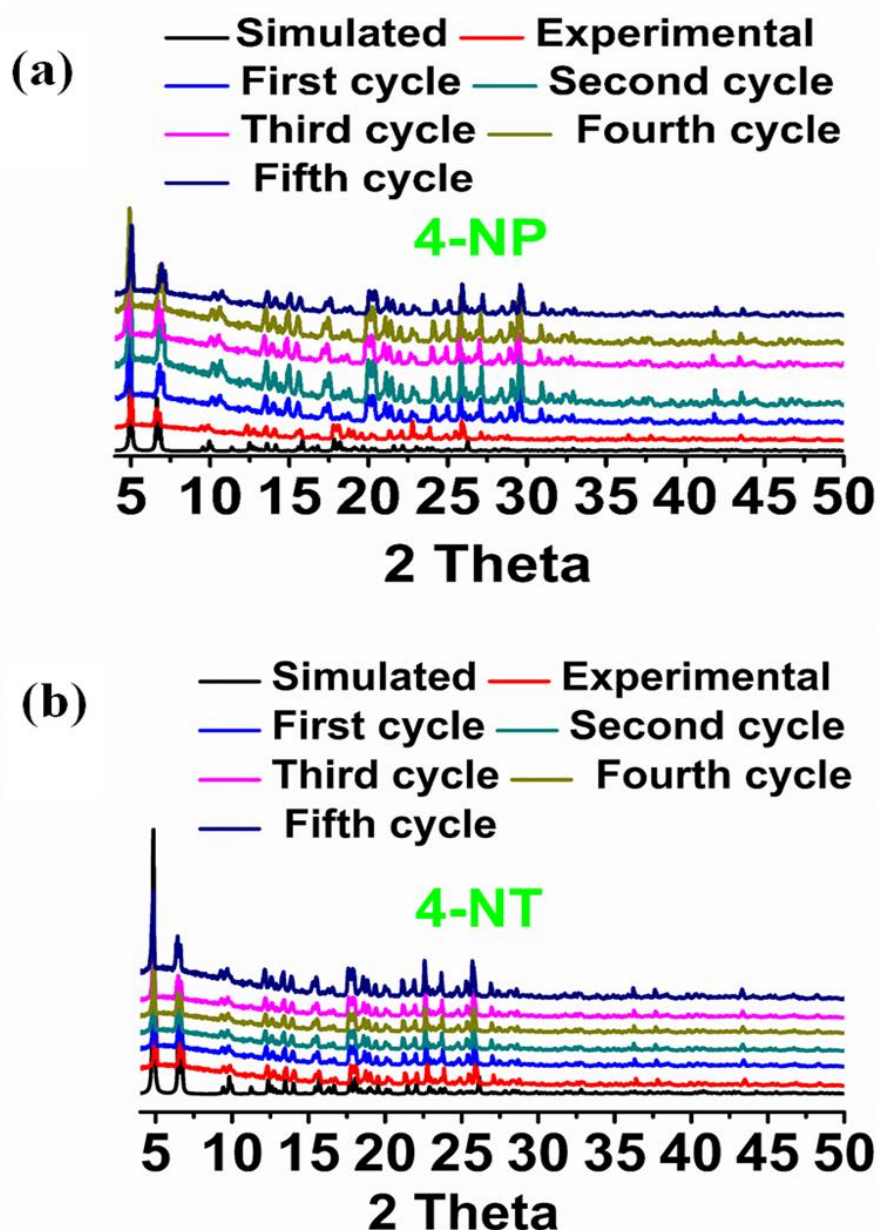

**Fig. S33.** (a-b) PXRD patterns of original sample of **Cd-MOF** (experimental, red trace; simulated, black) and the recovered sample of **Cd-MOF** after each cycle of quenching with 4-NP and 4-NT respectively.

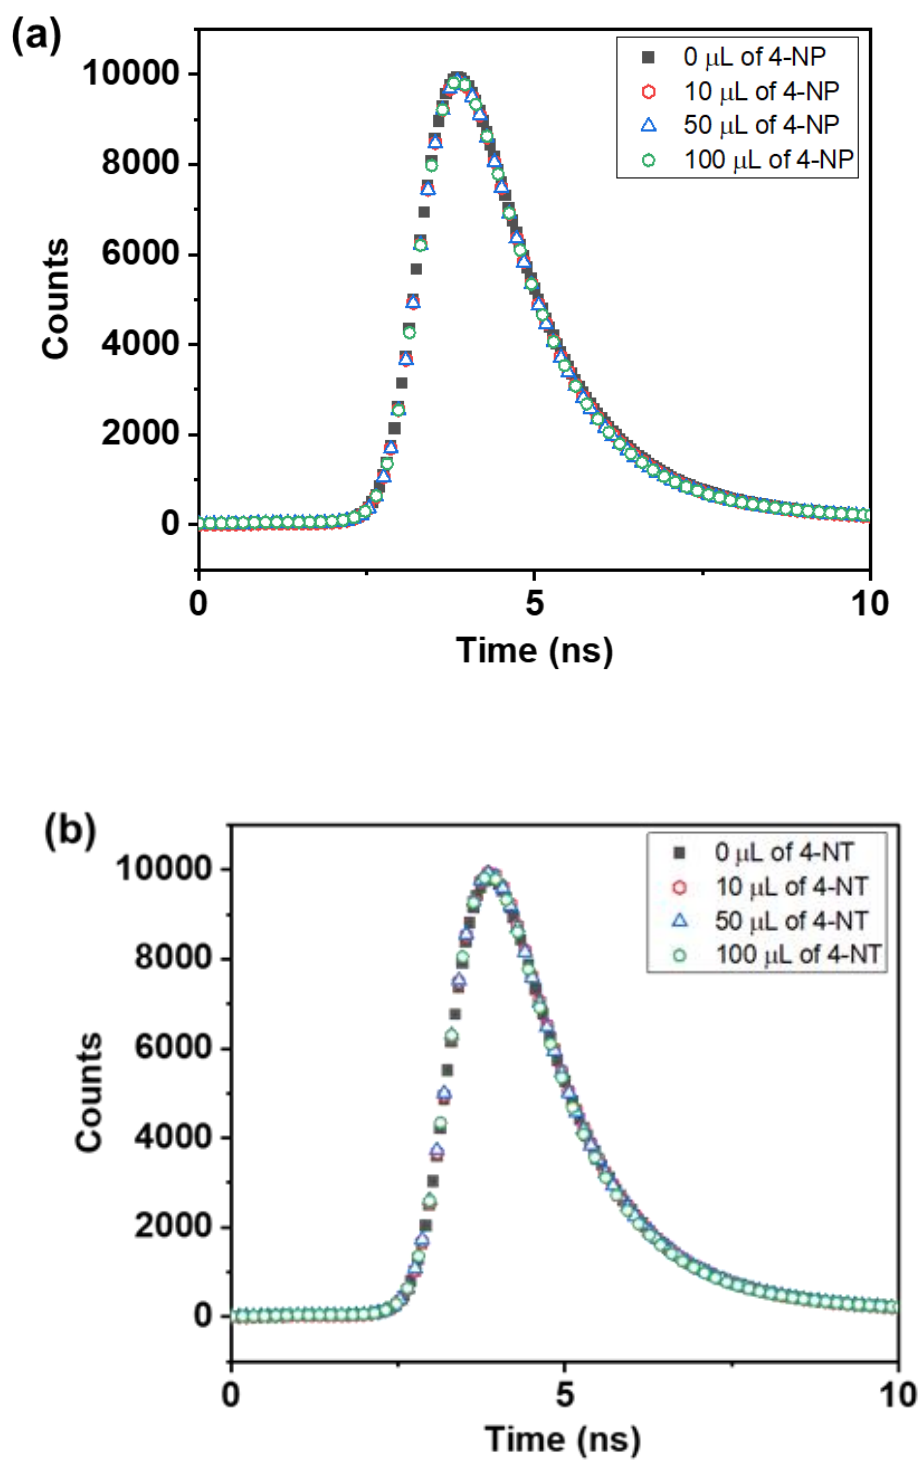

**Fig. S34.** (a-b) Lifetime decay curves of **Cd-MOF** before and after the addition of 4-NP and 4-NT, respectively.

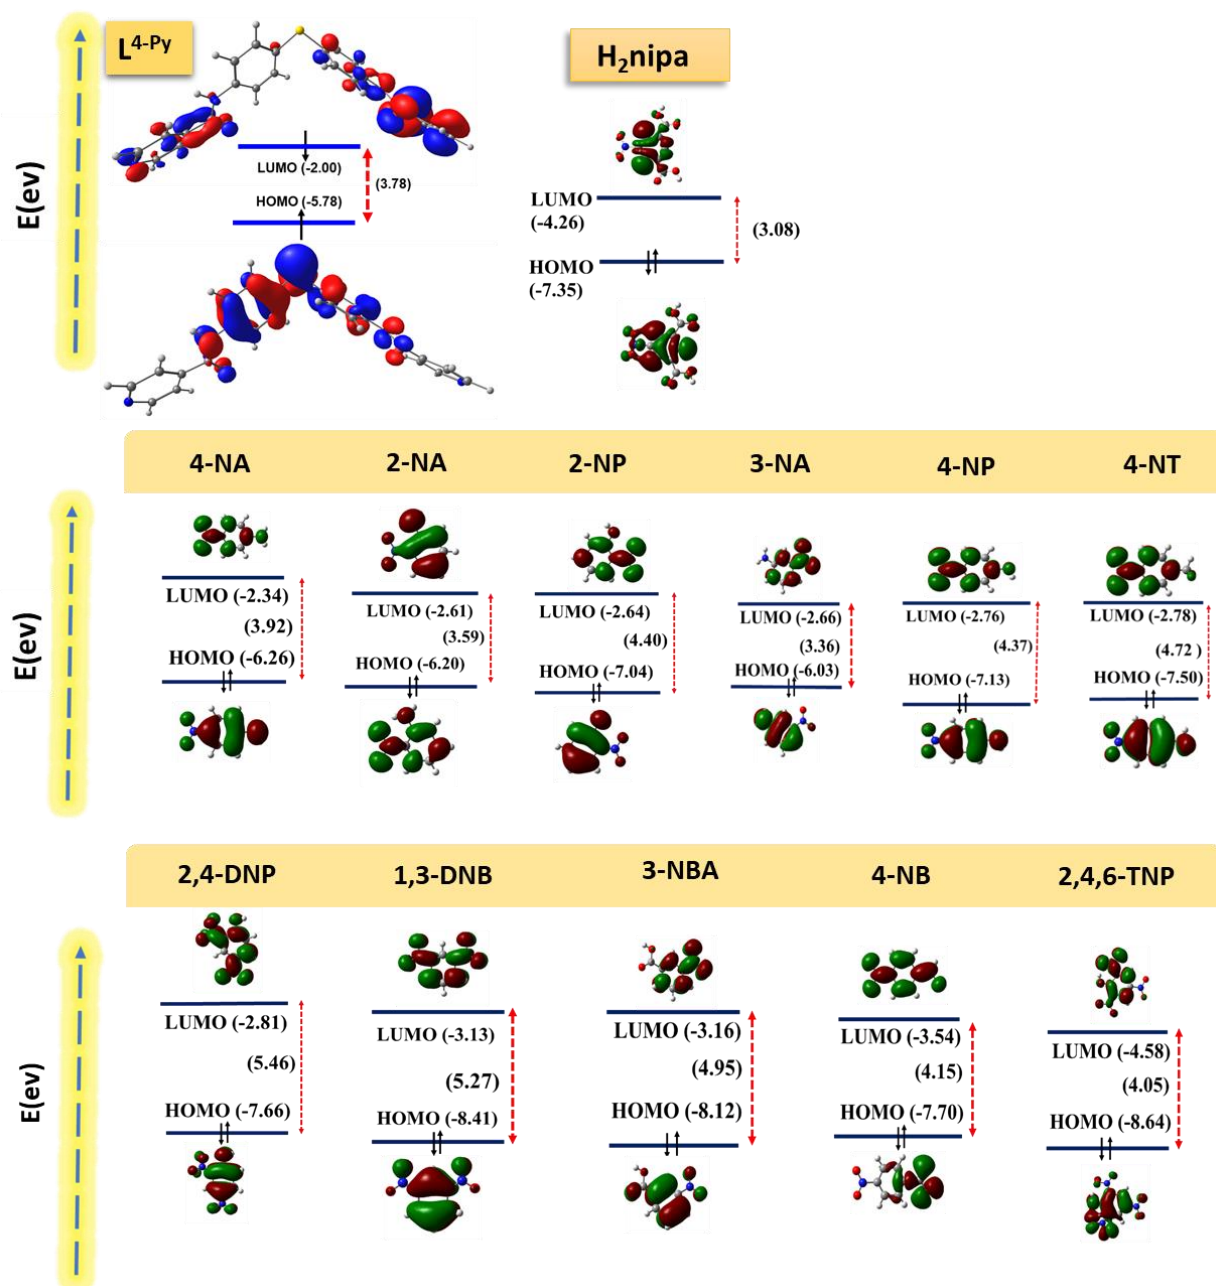

**Fig. S35.** Theoretically optimized HOMO and LUMO energies of **L<sup>4</sup>-py**, **H<sub>2</sub>nipa** and examined nitroaromatics using the B3LYP/6-31G protocol.

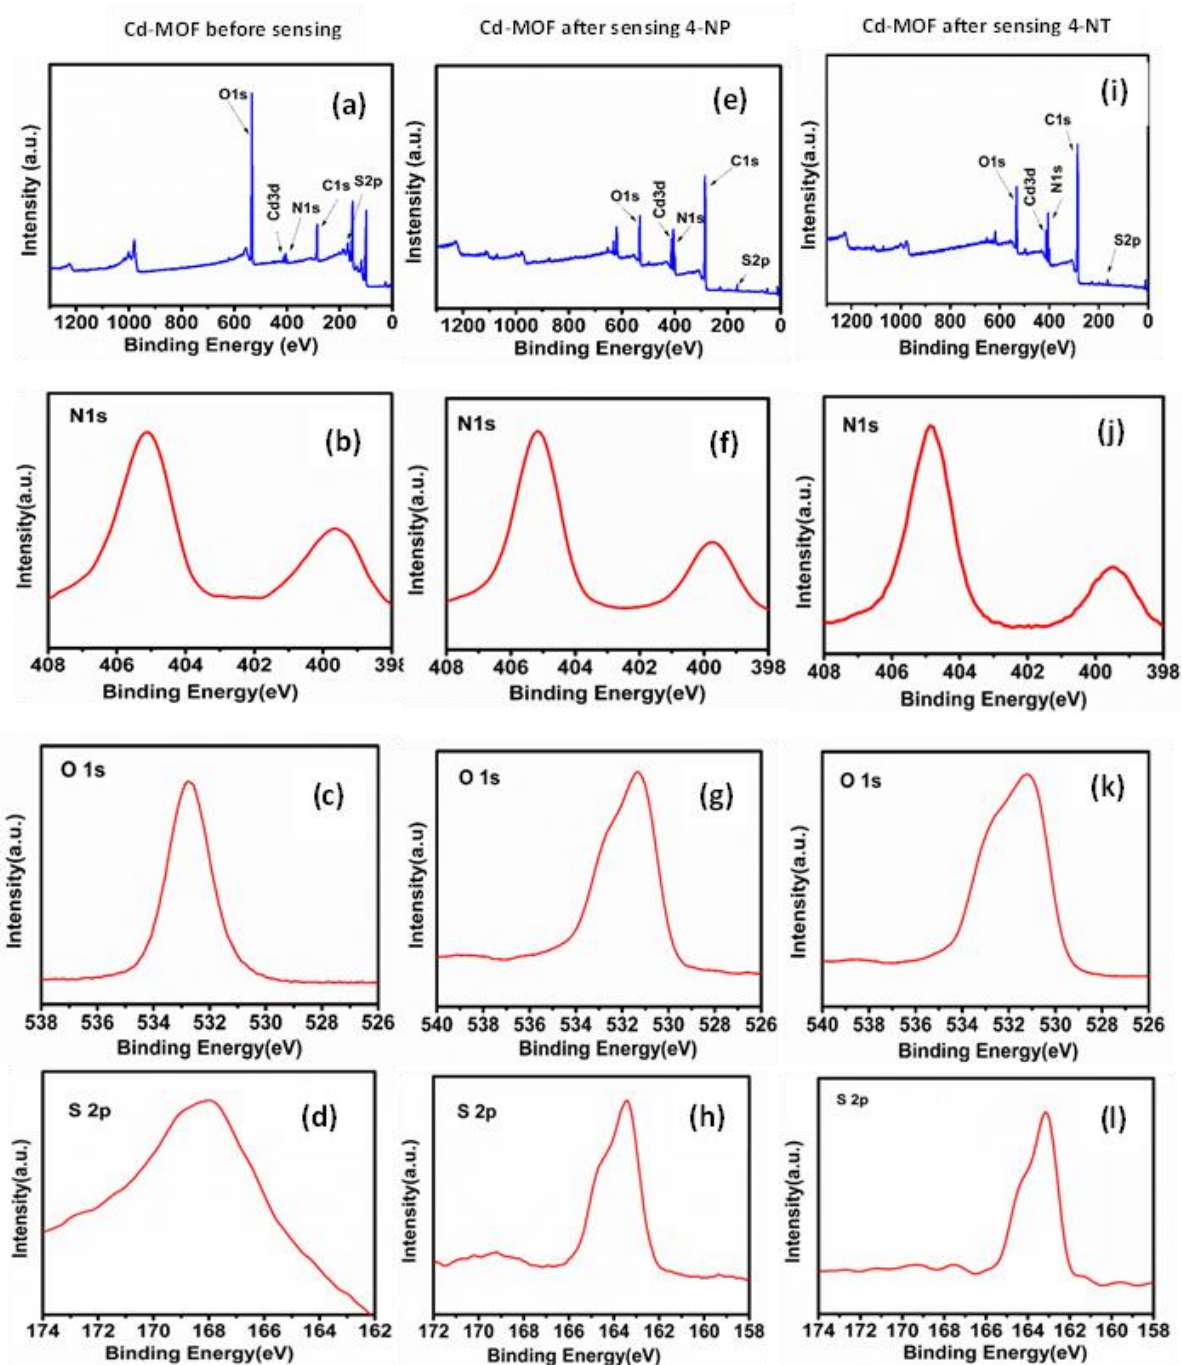

**Fig. S36.** (a) XPS spectrum of **Cd-MOF** before sensing. (b-d) XPS spectrum of **Cd-MOF** for N 1s, O 1s, S 2p before sensing. (e) XPS spectrum of **Cd-MOF** after sensing 4-NP. (f-h) XPS spectrum of **Cd-MOF** for N 1s, O 1s, S 2p after sensing 4-NP. (i) XPS spectrum of **Cd-MOF** after sensing 4-NT. (j-l) XPS spectrum of **Cd-MOF** for N 1s, O 1s, S 2p after sensing 4-NT.

**Table S1.** Crystal data and structure refinement for **L<sup>4-Py</sup>** and **Cd-MOF**.

|                                                                                  | <b>L<sup>4-Py</sup></b>                                                    | <b>Cd-MOF</b>                                                               |
|----------------------------------------------------------------------------------|----------------------------------------------------------------------------|-----------------------------------------------------------------------------|
| CCDC number                                                                      | <b>2371129</b>                                                             | <b>2371128</b>                                                              |
| Empirical formula                                                                | C <sub>24</sub> H <sub>18</sub> N <sub>4</sub> O <sub>2</sub> S            | C <sub>40</sub> H <sub>40</sub> CdN <sub>7</sub> O <sub>11</sub> S          |
| Formula weight                                                                   | 426.48                                                                     | 939.25                                                                      |
| Temperature [K]                                                                  | 293(2)                                                                     | 220(80)                                                                     |
| Crystal system                                                                   | triclinic                                                                  | monoclinic                                                                  |
| Space group (number)                                                             | <i>P</i> $\bar{1}$ (2)                                                     | <i>C</i> 2/ <i>c</i> (15)                                                   |
| <i>a</i> [Å]                                                                     | 9.3689(3)                                                                  | 37.8579(8)                                                                  |
| <i>b</i> [Å]                                                                     | 12.8121(3)                                                                 | 9.96330(10)                                                                 |
| <i>c</i> [Å]                                                                     | 18.4744(3)                                                                 | 28.3070(6)                                                                  |
| $\alpha$ [°]                                                                     | 98.161(2)                                                                  | 90                                                                          |
| $\beta$ [°]                                                                      | 90.769(2)                                                                  | 109.014(2)                                                                  |
| $\gamma$ [°]                                                                     | 111.088(2)                                                                 | 90                                                                          |
| Volume [Å <sup>3</sup> ]                                                         | 2043.11(9)                                                                 | 10094.5(3)                                                                  |
| <i>Z</i>                                                                         | 4                                                                          | 8                                                                           |
| $\rho_{\text{calc}}$ [gcm <sup>-3</sup> ]                                        | 1.386                                                                      | 1.236                                                                       |
| $\mu$ [mm <sup>-1</sup> ]                                                        | 0.188                                                                      | 0.530                                                                       |
| <i>F</i> (000)                                                                   | 888                                                                        | 3848                                                                        |
| Crystal colour                                                                   | Colourless                                                                 | Yellow                                                                      |
| Crystal shape                                                                    | Block                                                                      | block                                                                       |
| Radiation                                                                        | Mo <i>K</i> $\alpha$ ( $\lambda$ =0.71073 Å)                               | Mo <i>K</i> $\alpha$ ( $\lambda$ =0.71073 Å)                                |
| 2 $\theta$ range [°]                                                             | 6.69 to 54.78 (0.77 Å)                                                     | 6.25 to 54.91 (0.77 Å)                                                      |
| Index ranges                                                                     | -12 $\leq h \leq$ 12; -15 $\leq k \leq$ 16; -23 $\leq l \leq$ 23           | -47 $\leq h \leq$ 47; -12 $\leq k \leq$ 12; -36 $\leq l \leq$ 36            |
| Reflections collected                                                            | 19420                                                                      | 68409                                                                       |
| Independent reflections                                                          | 7699; <i>R</i> <sub>int</sub> = 0.0375; <i>R</i> <sub>sigma</sub> = 0.0502 | 10864; <i>R</i> <sub>int</sub> = 0.0624; <i>R</i> <sub>sigma</sub> = 0.0464 |
| Completeness to $\theta$ = 26.000°                                               | 91.4 %                                                                     | 99.5 %                                                                      |
| Data / Restraints / Parameters                                                   | 7699/0/559                                                                 | 10864/495/434                                                               |
| Absorption correction <i>T</i> <sub>min</sub> / <i>T</i> <sub>max</sub> (method) | 0.962/0.972 (multi-scan)                                                   | 0.57767/1.00000 (multi-scan)                                                |
| Goodness-of-fit on <i>F</i> <sup>2</sup>                                         | 1.118                                                                      | 1.071                                                                       |
| Final <i>R</i> indexes [ <i>I</i> $\geq 2\sigma(I)$ ]                            | <i>R</i> <sub>1</sub> = 0.0519; <i>wR</i> <sub>2</sub> = 0.1276            | <i>R</i> <sub>1</sub> = 0.0412; <i>wR</i> <sub>2</sub> = 0.1228             |
| Final <i>R</i> indexes [all data]                                                | <i>R</i> <sub>1</sub> = 0.0825; <i>wR</i> <sub>2</sub> = 0.1423            | <i>R</i> <sub>1</sub> = 0.0546; <i>wR</i> <sub>2</sub> = 0.1367             |
| Largest peak/hole [eÅ <sup>-3</sup> ]                                            | 0.29/-0.24                                                                 | 0.58/-0.53                                                                  |

**Table S2.** Selected bond length and angles for **Cd-MOF**.

| Bond                                   | Bond Length | Bond                                   | Bond Angles |
|----------------------------------------|-------------|----------------------------------------|-------------|
| Cd1–O4 <sup>#1</sup>                   | 2.506(2)    | O1–Cd1–O2                              | 96.53(9)    |
| Cd1–O2                                 | 2.496(2)    | O1–Cd1–O5 <sup>#1</sup>                | 90.57(9)    |
| Cd1–O5 <sup>#1</sup>                   | 2.322(2)    | O1–Cd1–N4 <sup>#2</sup>                | 169.43(9)   |
| Cd1–O1                                 | 2.318(3)    | O1–Cd1–N1                              | 85.65(9)    |
| Cd1–O3                                 | 2.279(2)    | O1–Cd1–C8 <sup>#1</sup>                | 85.98(10)   |
| Cd1–N4 <sup>#2</sup>                   | 2.364(3)    | O3–Cd1–O4 <sup>#1</sup>                | 131.19(7)   |
| Cd1–N1                                 | 2.334(3)    | O3–Cd1–O2                              | 54.50(7)    |
| Cd1–C8 <sup>#1</sup>                   | 2.744(3)    | O3–Cd1–O5 <sup>#1</sup>                | 77.02(8)    |
| S1–C18                                 | 1.780(3)    | O3–Cd1–O1                              | 94.53(10)   |
| S1–C21                                 | 1.780(4)    | O3–Cd1–N4 <sup>#2</sup>                | 95.91(10)   |
| Bond                                   | Bond Angles | O3–Cd1–N1                              | 142.03(9)   |
| O4 <sup>#1</sup> –Cd1–C8 <sup>#1</sup> | 27.10(7)    | O3–Cd1–C8 <sup>#1</sup>                | 104.10(8)   |
| O2–Cd1–O4 <sup>#1</sup>                | 174.07(7)   | N4 <sup>#2</sup> –Cd1–O4 <sup>#1</sup> | 89.30(8)    |
| O2–Cd1–C8 <sup>#1</sup>                | 158.53(8)   | N4 <sup>#2</sup> –Cd1–O2               | 88.27(8)    |
| O5 <sup>#1</sup> –Cd1–O4 <sup>#1</sup> | 54.21(7)    | N4 <sup>#2</sup> –Cd1–C8 <sup>#1</sup> | 93.01(9)    |
| O5 <sup>#1</sup> –Cd1–O2               | 131.34(7)   | N1–Cd1–O4 <sup>#1</sup>                | 86.72(8)    |
| O5 <sup>#1</sup> –Cd1–N4 <sup>#2</sup> | 93.32(8)    | N1–Cd1–O2                              | 87.69(8)    |
| O5 <sup>#1</sup> –Cd1–N1               | 140.93(8)   | N1–Cd1–N4 <sup>#2</sup>                | 85.14(10)   |
| O5 <sup>#1</sup> –Cd1–C8 <sup>#1</sup> | 27.19(8)    | N1–Cd1–C8 <sup>#1</sup>                | 113.77(9)   |
| O1–Cd1–O4 <sup>#1</sup>                | 85.01(9)    |                                        |             |

Symmetry transformations used to generate equivalent atoms: (#1) +X, -1+Y, +Z; (#2) 1.5-X, 0.5-Y, 1-Z; (#3) +X, 1+Y, +Z.

**Table S3.** Hydrogen bonding for ligand **L<sup>4-py</sup>**.

| D–H...A [Å]                | d(D–H) [Å] | d(H...A) [Å] | d(D...A) [Å] | <(DHA) [°] |
|----------------------------|------------|--------------|--------------|------------|
| N7–H7...O2 <sup>#1</sup>   | 0.86       | 2.17         | 2.929(2)     | 147.6      |
| N6–H6...N4 <sup>#2</sup>   | 0.86       | 2.12         | 2.964(2)     | 165.9      |
| C45–H45...O1 <sup>#3</sup> | 0.93       | 2.63         | 3.547(3)     | 169.4      |
| C35–H35...N1 <sup>#3</sup> | 0.93       | 2.67         | 3.344(3)     | 129.5      |
| C36–H36...O4               | 0.93       | 2.33         | 2.919(3)     | 121.3      |
| C39–H39...O3               | 0.93       | 2.35         | 2.899(3)     | 117.7      |
| N3–H3...N5 <sup>#4</sup>   | 0.86       | 2.11         | 2.970(2)     | 173.9      |
| N2–H2...O3                 | 0.86       | 2.39         | 3.131(2)     | 144.7      |
| C8–H8...S2 <sup>#5</sup>   | 0.93       | 2.92         | 3.441(2)     | 117.0      |
| C24–H24...O4 <sup>#6</sup> | 0.93       | 2.56         | 3.464(3)     | 164.0      |
| C12–H12...O1               | 0.93       | 2.31         | 2.908(3)     | 121.4      |
| C15–H15...O2               | 0.93       | 2.27         | 2.881(3)     | 123.1      |
| C22–H22...S2 <sup>#7</sup> | 0.93       | 3.01         | 3.929(3)     | 168.9      |

Symmetry transformations used to generate equivalent atoms: #1: 1+X, +Y, +Z; #2: 1+X, +Y, 1+Z; #3: 1-X, 1-Y, 1-Z; #4: +X, +Y, -1+Z; #5: -1+X, +Y, +Z; #6: 1-X, 1-Y, -Z; #7: -X, -Y, -Z.

**Table S4.** Hydrogen bonding for **Cd-MOF**.

| D–H...A [Å]               | d(D–H) [Å] | d(H...A) [Å] | d(D...A) [Å] | <(DHA) [°] |
|---------------------------|------------|--------------|--------------|------------|
| O1–H1A...O8 <sup>#1</sup> | 0.90       | 2.05         | 2.816(4)     | 142.5      |
| C20–H20...O8              | 0.94       | 2.23         | 2.833(4)     | 121.4      |

Symmetry transformations used to generate equivalent atoms: (#1): 1-X, -Y, 1-Z;

**Table S5.** Fluorescence quantum yields of the **L<sup>4-py</sup>**, **H<sub>2</sub>nipa** and **Cd-MOF**.

| S.No. | Compound                 | Wavelength $\lambda_{\text{ex}}$ ( $\lambda_{\text{em}}$ ) [nm] | Fluorescence Quantum Yield ( $\Phi_{\text{F}}$ ) | Stokes Shift |
|-------|--------------------------|-----------------------------------------------------------------|--------------------------------------------------|--------------|
| 1     | <b>L<sup>4-py</sup></b>  | 300(435)                                                        | 0.25                                             | 135          |
| 2     | <b>H<sub>2</sub>nipa</b> | 285(436)                                                        | 0.18                                             | 151          |
| 3     | <b>Cd-MOF</b>            | 290 (444)                                                       | 0.40                                             | 154          |

Quantum yield ( $\Phi$ ) is defined as the ratio of the number of photons emitted to the number of photons absorbed. For the measurements of quantum yield of **L<sup>4-py</sup>**, co-ligand **H<sub>2</sub>nipa**, and **Cd-MOF**, the standards used were 2-Aminopyridine in  $\text{H}_2\text{SO}_4$ , naphthalene in cyclohexane, and 9,10-Diphenylanthracene in cyclohexane, respectively. It is important to mention that **Cd-MOF** exhibits the highest 40.30% ( $\Phi_{\text{F}} = 0.40$ ) of fluorescence quantum yields when excited at 290 nm. Whereas under identical conditions, ligand **L<sup>4-py</sup>** and co-ligand **H<sub>2</sub>nipa** show quantum yields of 25.30% ( $\Phi_{\text{F}} = 0.25$ ) and 18.40% ( $\Phi_{\text{F}} = 0.18$ ), when excited at 300 and 285 nm, respectively.<sup>54</sup>

**Table S6.** Stern–Volmer (SV) quenching constant and detection limits of all examined analytes.

| Sr. No. | Nitroanalytes | LOD ( $\mu\text{M}$ ) | $K_{\text{SV}}$ ( $\text{M}^{-1}$ ) | $K_{\text{b}}$ ( $\text{M}^{-1}$ ) |
|---------|---------------|-----------------------|-------------------------------------|------------------------------------|
| 1.      | 2-NA          | 0.176                 | $1.14 \times 10^4$                  | $2.62 \times 10^{-4}$              |
| 2.      | 3-NA          | 0.120                 | $5.23 \times 10^3$                  | $3.00 \times 10^{-4}$              |
| 3.      | 4-NA          | 0.170                 | $8.62 \times 10^3$                  | $1.06 \times 10^{-3}$              |
| 4.      | 2-NP          | 0.178                 | $1.5 \times 10^3$                   | $6.42 \times 10^{-3}$              |
| 5.      | 4-NP          | 0.166                 | $3.09 \times 10^4$                  | $5.41 \times 10^{-3}$              |
| 6.      | 4-NT          | 0.184                 | $3.09 \times 10^4$                  | $1.37 \times 10^{-2}$              |
| 7.      | 4-NB          | 0.117                 | $7.58 \times 10^3$                  | $4.30 \times 10^{-3}$              |
| 8.      | 3-NBA         | 0.158                 | $3.5 \times 10^3$                   | $2.8 \times 10^{-4}$               |
| 9.      | 1,3-DNB       | 0.084                 | $9.21 \times 10^3$                  | $1.02 \times 10^{-2}$              |
| 10.     | 2,4-DNP       | 0.080                 | $13.2 \times 10^3$                  | $1.4 \times 10^{-2}$               |
| 11.     | 2,4,6-TNP     | 0.101                 | $18.2 \times 10^3$                  | $1.2 \times 10^{-2}$               |

**Table S7.** A comparative list of various fluorescent MOFs including **Cd-MOF** that have been used for sensing of various nitroaromatics.

| CPs / MOFs                                                                                | Analytes         | Quenching constant ( $K_{sv}$ , $M^{-1}$ )      | Limit of detection ( $\mu M$ ) | Solvent  | Ref.         |
|-------------------------------------------------------------------------------------------|------------------|-------------------------------------------------|--------------------------------|----------|--------------|
| $[Cd(L^{4-Py})(nipa)(H_2O)]_n$ ( <b>Cd-MOF</b> )                                          | 4-NP             | $3.098 \times 10^4$                             | 0.166                          | Methanol | In this work |
| $[Cd_3(BPPA)_3(aba)_3]_n$                                                                 | 4-NP             | $6.74 \times 10^4$                              | 34.48 ppb                      | DMF      | S5           |
| $[Cd_2(HL^1)(btc)(H_2O)_2] \cdot 3H_2O$                                                   | 4-NP             | $2.69 \times 10^4$                              | 0.575                          | DMF      | S6           |
| $Zn(DMA)(TBA)$                                                                            | 4-NP             | $4.39 \times 10^4$                              | 1.43                           | Ethanol  | S7           |
| $[Zn(L^2)(H_2O)] \cdot H_2O$                                                              | 4-NP             | $1.25 \times 10^4$                              | 3.74                           | Water    | S8           |
| $\{[Zn_3(mtrb)_3(btc)_2] \cdot 3H_2O\}_n$                                                 | 4-NP             | $1.276 \times 10^4$                             | 2.56                           | Methanol | S9           |
| $[Cd(ppvppa)(1,4-NDC)]_n$                                                                 | 2,4-DNP/<br>4-NP | 118 / 15                                        | 70 ppm /<br>120 ppm            | Water    | S10          |
| $\{[Zn_2(L^3)(DMF)_3] \cdot 2DMF \cdot 2H_2O\}$                                           | 2,4-DNP/<br>4-NP | $2.40 \times 10^4$ ,<br>$1.52 \times 10^4$      | 0.77 ppm /<br>1.03 ppm         | DMF      | S11          |
| $(Zn_2(NDC)_2(bpy) \cdot Gx)$<br>(G = Guest molecules)                                    | 2,4-DNP/<br>4-NP | $1.5 \times 10^{-4}$ /<br>$1.06 \times 10^{-4}$ | 0.284 /<br>0.347               | Ethanol  | S12          |
| $[Cd(AA)(bpa)(OH_2)]_n$                                                                   | 4-NP             | $5.07 \times 10^5$                              | --                             | Water    | S13          |
| $[Zn_2(TCPE)(tta)_2] \cdot 2DMF \cdot 4H_2O \cdot 2Me_2NH_2$<br>+                         | 4-NP             | 1621.97                                         | 0.68                           | DMF      | S14          |
| $[Cd_3(H_2O)_3(L^4)(tib)_2] \cdot 5DMA \cdot 4H_2O$                                       | 4-NP             | $1.557 \times 10^4$                             | 74                             | DMF      | S15          |
| $\{[(CH_3)_2NH_2]_2[Cd_3(TCPPDA)_2] \cdot 5DMF \cdot 8H_2O\}_n$                           | 4-NP             | $3.25 \times 10^5$                              | 7.5                            | DMF      | S16          |
| $\{(Me_2NH_2)_{10}[Zn_6L_4(\mu_3O)_2Zn_3] \cdot Gx\}_n$<br>(G = Guest molecules) (FJI-C8) | 2,4-DNP          | $5.11 \times 10^4$                              | 2.86                           | DMF      | S17          |
| $[Zn_4(Hbpvp)_2BTC]_3(HCOO)(H_2O)_2] \cdot 4H_2O$                                         | 2,4-DNP          | --                                              | 1.0                            | Water    | S18          |
| $\{[Zn(L^5)] \cdot 4H_2O \cdot 2CH_3CN\}_n$                                               | 2,4-DNP/<br>4-NP | $3.07 \times 10^4$ /<br>$8.21 \times 10^4$      | 8.49 /<br>4.49 mM              | DMF      | S19          |
| $\{[NH_2(CH_3)_2][Zn_4(ddn)_2(COO)(H_2O)_4] \cdot solvent\}_n$                            | 2,4-DNP          | $8.93 \times 10^3$                              | 1.12 ppm                       | DMF      | S20          |

**Abbreviation:**  $L^{4-Py}$  = *N,N'*-(thiobis(4,1-phenylene))diisonicotinamide;  $H_2nipa$  = 5-nitroisophthalic acid; BPPA = bis(4-(pyridine-4-yl)phenyl)amine),  $H_2aba$  = 4,4'-azanediyldibenzoic acid,  $H_2L^1$  = 1-(1H-imidazol-4-yl)-4-(4H-tetrazol-5-yl)benzene),  $H_3btc$  = 1,3,5-benzenetricarboxylic acid,  $H_2TBA$  = 4-(1H-tetrazol-5-yl)-benzoic acid), DMA = Dimethylacetamide,  $H_2L^2$  = 5-(2-methylpyridin-4-yl)isophthalic acid, mtrb = 1,3-bis(1,2,4-triazole-4-ylmethyl)benzene, ppvppa = N-(pyridin-2-yl)-N-(4-(2-(pyridin-4-yl)vinyl)phenyl)pyridin-2-amine, 1,4- $H_2NDC$  = 1,4-naphthalenedicarboxylic acid,  $H_4L^3$  = terphenyl-3,3'',5,5''-tetracarboxylic acid, NDC = 2,6-naphthalene dicarboxylic acid, bpy = 4,4' bipyridine, G = guest solvent molecules, AA = adipic acid, bpa = 1,2-bis(4-pyridyl)ethane),  $H_4TCPE$  = 1,1,2,2-tetra(4-carboxylphenyl)ethylene, 1H-tta = 1H-tetrazole,  $H_6L^4$  = 5,5',5''-(benzene-1,3,5-tricarbonyl)tris(azanediyll)trisiophthalic acid, tib = 1,3,5-tri(1H-imidazol-1-yl)benzene,  $H_4TCPPDA$  = N,N,N',N'-Tetrakis(4-carboxyphenyl)-1,4-phenylenediamine, FJI-C8 (*FJI stands for Fujian Institute of Research on the Structure of Matter, C stands for Cao's group, 8 stands for the number of newly synthesized crystals in his group*), bpvp = 3,5-

bis-(2-(pyridin-4-yl)vinyl)pyridine, H<sub>2</sub>L<sup>5</sup> = 5-(3,5-Di-pyr-idin-4-yl-[1,2,4]triazol-1-ylmethyl)-isophthalic acid, H<sub>4</sub>ddn=3,5-di(3,5-dicarboxylphenyl)nitrobenzene.

**Table S8.** Integral Orbital Overlap J(λ) values of nitro-analytes.

| S.No. | Nitro analytes | J(λ)(M <sup>-1</sup> cm <sup>-1</sup> nm <sup>4</sup> ) |
|-------|----------------|---------------------------------------------------------|
| 1     | 4-NP           | 3.3 × 10 <sup>8</sup>                                   |
| 2     | 4-NT           | 4.8 × 10 <sup>7</sup>                                   |
| 3     | 2,4-DNP        | 4.5 × 10 <sup>7</sup>                                   |
| 4     | 2-NP           | 3.5 × 10 <sup>7</sup>                                   |
| 5     | 2-NA           | 5.9 × 10 <sup>7</sup>                                   |
| 6     | 4-NA           | 2.5 × 10 <sup>7</sup>                                   |
| 7     | 3-NA           | 1.6 × 10 <sup>7</sup>                                   |
| 8     | 3-NBA          | 4.2 × 10 <sup>6</sup>                                   |
| 9     | 4-NB           | 3.7 × 10 <sup>6</sup>                                   |
| 10    | 2,4,6-TNP      | 1.9 × 10 <sup>6</sup>                                   |
| 11    | 1,3-DNB        | 1.8 × 10 <sup>6</sup>                                   |

Calculation of extent of overlapping.

The extent of overlapping of emission spectra of **Cd-MOF** with absorbance spectra of all nitroanalytes compounds has been calculated using formula (1) given below.<sup>S21</sup>

$$J(\lambda) = \int_0^{\infty} F_D(\lambda) \varepsilon_A(\lambda) \lambda^4 d\lambda \dots \dots \dots (1)$$

Where F(λ) is the corrected fluorescence intensity of the donor (here **Cd-MOF**) in the range of λ to λ+Δλ with total intensity normalized to unity, ε<sub>A</sub> is the molar extinction coefficient of the acceptor (here nitroanalytes) at λ in mol<sup>-1</sup> cm<sup>-1</sup>.

## References.

- S1. B.-C. Tzeng, T.-Y. Chang and H.-S. Sheu, *Chem. Eur. J.*, 2010, **16**, 9990-9993.
- S2. A. Ganguly, B.K. Paul, S. Ghosh, S. Kar and N. Guchhait, *Analyst*, 2013, **138**, 6532-6541.
- S3. S. Pandey, P. Kumar and R. Gupta, *Dalton Trans.*, 2018, **47**, 14686-14695.
- S4. A. M. Brouwer, Standards for photoluminescence quantum yield measurements in solution. *Pure Appl. Chem.*, 2011, **83**, 2213-2228.
- S5. Z. J. Wang, L. Qin, J.-Xi. Chen and H.-G. Zheng, *Inorg. Chem.*, 2016, **55**, 10999–11005.

- S6. X.-Z. Guo, S.-S. Chen, W.-D. Li, S.-S. Han, F. Deng, R. Qiao and Y. Zhao, *ACS Omega*, 2019, **4**, 11540-11553.
- S7. X. Zhang, X. Luo, N. Zhang, J. Wu and Y.-Q. Huang, *Inorg. Chem. Front.*, 2017, **4**, 1888-1894.
- S8. X.-Y. Guo, F. Zhao, J.-J. Liu, Z.-L. Liu and Y.-Q. Wang, *J. Mater. Chem. A*, 2017, **5**, 20035.
- S9. Y.-Q. Zhang, V. A. Blatov, T.-R. Zheng, C.-H. Yang, L.-L. Qian, K. Li, B.-L. Li and B. Wu, *Dalton Trans.*, 2018, **47**, 6189-6198.
- S10. M.-M. Chen, X. Zhou, H.-X. Li, X.-X. Yang and J.-P. Lang, *Cryst. Growth Des.*, 2015, **15**, 2753-2760.
- S11. J.-C. Jin, J. Wu, Y.-X. He, B.-H. Li, J.-Q. Liu, R. Prasad, A. Kumar and S. R. Batten, *CrystEngComm*, 2017, **19**, 6464-6472.
- S12. N. Kajal, and S. Gautam, *Chem. Eng. J. Adv.*, 2022, **11**, 100348.
- S13. N. Goel and N. Kumar, *Inorganica Chim. Acta.*, 2020, **53**, 119352.
- S14. X. Zhang, G. Ren, M. Li, W. Yang and Q. Pan, *Cryst. Growth Des.*, 2019, **19**, 6308-6314.
- S15. X.-Yu. Sun, X.-D. Zhangb, Z.-H. Xub, Y. Zhaob, Z.-L. Wanga and W.-Y. Sun, *J. Coord. Chem.*, 2020, **73**, 2728-2739.
- S16. J. Ru, Y.-X. Shi, S.-C. Fu, Q. Guo, L.-L. Li and Y.-L. Wang, *Inorganica Chim. Acta.*, 2023, **555**, 121574.
- S17. X.-S. Wang, L. Li, D.-Q. Yuan, Y.-B. Huang and R. Cao, *J. Hazard. Mater.*, 2018, **344**, 283-290.
- S18. Y.-X. Shi, F.-L. Hu, F.-L. Hu and J.-P. Lang, *CrystEngComm*, 2015, **17**, 9404.
- S19. Z. Xu, M. Su, X. He, B. Zhang, Y. Wang and H. Li, *Inorg. Chem. Commun.*, 2020, **111**, 107644.
- S20. A. Ma, J. Wu, Y. Han, F. Chen, B. Li, S. Cai, H. Huang, A. Singh, A. Kumar and J. Liu, *Dalton Trans.*, 2018, **47**, 9627.
- S21. J. R. Lakowicz, *Principles of Fluorescence spectroscopy*, 3rd ed., Springer, Singapore, 2010, 443-472.

\*\*\*\*\*
